# Supplementary material for: Estrogen receptors promote NSCLC progression by modulating the membrane receptor signaling network: a systems biology perspective
Source: J Transl Med. 2019 Sep 11;17:308. doi: 10.1186/s12967-019-2056-3 (PMC6737693; doi:10.1186/s12967-019-2056-3)
Supplement: Supplementary file 2 — Additional file 2. Complete results of the GO and KEGG enrichment analysis. [file 12967_2019_2056_MOESM2_ESM.xls]

## Sheet: Downgrade DGEs in ESR1 group 
Category	Term	Count	%	PValue	Genes
GOTERM_BP_DIRECT	GO:0045944~positive regulation of transcription from RNA polymerase II promoter	37	8.50575	0.00186749	FGFR2, WNT3A, E2F7, SOX2, HOXD13, TP63, JAG1, POMC, ZIC1, SOHLH1, HOXD10, MED12L, RGMA, BARX1, BCL11A, P2RY1, HOXA10, SOX15, NRG1, NKX2-5, FOXD1, PITX1, FOXL2, OTX1, OTX2, DMRT1, CHP2, SIX2, DMRT2, EN1, GRHL3, GAL, HMGA2, DLX2, ITGA6, HOXC13, BMP7
GOTERM_BP_DIRECT	GO:0000122~negative regulation of transcription from RNA polymerase II promoter	26	5.97701	0.0169911	FGFR2, E2F7, FST, SOX2, MAGEA1, MAGEA2, TP63, PRDM13, HOXC8, NRARP, BCL11A, SOX15, NKX2-5, ZNF280A, FOXL2, RCOR2, TRIM29, DMRT1, EN1, VAX1, HMGA2, NR0B1, DLX2, DLX1, FOXE1, TBX18
GOTERM_BP_DIRECT	GO:0055114~oxidation-reduction process	25	5.74713	0.00314118	CYB5R2, UTY, NDUFA4L2, CYP2S1, HR, CYP26A1, OSGIN1, CYP4F11, ADH7, CYP2W1, ALDH3A1, SESN3, AKR1C3, GPX2, AKR1C2, PIR, AKR1B10, PHGDH, FMO6P, ALOX12B, CYP4F3, NOS2, SRXN1, AKR1C1, KDM5D
GOTERM_BP_DIRECT	GO:0008544~epidermis development	24	5.51724	3.71538e-19	S100A7, LCE3D, FOXN1, SPRR2G, KRT31, SPRR2F, GJB5, GRHL3, SPRR2E, KRT34, PTHLH, COL7A1, KRT5, KRT17, SPRR1A, SPRR2D, KRT16, SPRR1B, SPRR2A, KRT15, SPRR2B, KRT14, BNC1, SPRR3
GOTERM_BP_DIRECT	GO:0006366~transcription from RNA polymerase II promoter	24	5.51724	0.00105806	FOXL2, TRIM29, OTX1, POU6F2, OTX2, SOX2, FOXN1, DMRT1, SIX2, HOXD13, TP63, GRHL3, HMGA2, ZIC1, SOHLH1, DLX2, BARX1, HOXC13, PIR, DLX5, HOXA10, NKX2-5, FOXD1, PITX1
GOTERM_BP_DIRECT	GO:0030216~keratinocyte differentiation	21	4.82759	1.4573e-16	S100A7, LCE3D, FOXN1, SPRR2G, TP63, SPRR2F, JAG1, SPRR2E, AKR1C3, CRCT1, SPRR1A, SPRR2D, KRT16, SPRR1B, SPRR2A, SPRR2B, TGM1, SPRR3, TGM3, SPRR4, CSTA
GOTERM_BP_DIRECT	GO:0030154~cell differentiation	18	4.13793	0.0277886	INA, KRT6A, CPLX2, FOXL2, PRAME, NELL1, KRTDAP, OSGIN1, ZIC1, SOHLH1, ZIC2, DAPL1, CEL, NDRG4, ZIC5, BNC1, SOX15, NKX2-5
GOTERM_BP_DIRECT	GO:0008284~positive regulation of cell proliferation	18	4.13793	0.029718	FGFR2, ODC1, KRT6A, PRAME, WNT3A, CHP2, ALDH3A1, PTHLH, AKR1C3, HOXC10, AKR1C2, NTRK2, BNC1, SERPINB3, NRG1, FGFBP1, NKX2-5, ALOX12
GOTERM_BP_DIRECT	GO:0007399~nervous system development	16	3.67816	0.00183064	GDA, CPLX2, NELL1, DPYSL5, JAG1, FGF12, GAL, DPF1, BARX1, CHRM3, DLX6, DLX5, ZIC5, MSI1, NRG1, RAPGEFL1
GOTERM_BP_DIRECT	GO:0031424~keratinization	15	3.44828	1.21837e-12	LCE3D, SPRR2G, SPRR2F, SPRR2E, KRT17, SPRR1A, KRT16, SPRR2D, SPRR1B, SPRR2A, TGM1, SPRR2B, SPRR3, TGM3, SPRR4
GOTERM_BP_DIRECT	GO:0018149~peptide cross-linking	15	3.44828	2.27625e-12	LCE3D, SPRR2G, SPRR2F, SPRR2E, CRCT1, SPRR1A, SPRR2D, SPRR1B, SPRR2A, TGM1, SPRR2B, SPRR3, TGM3, SPRR4, CSTA
GOTERM_BP_DIRECT	GO:0010951~negative regulation of endopeptidase activity	14	3.21839	2.68224e-06	FETUB, A2ML1, AHSG, COL7A1, SERPINB5, CARD18, PI3, SERPINB2, SERPINB11, SERPINB4, SERPINB13, CSTA, SERPINB3, WFDC5
GOTERM_BP_DIRECT	GO:0001501~skeletal system development	14	3.21839	1.06423e-05	HOXA13, HOXA11, TP63, HOXD13, COL2A1, EN1, AHSG, PTHLH, HOXC10, DLX6, DLX5, HOXA10, BMP7, PITX1
GOTERM_BP_DIRECT	GO:0007420~brain development	14	3.21839	0.000310744	STAR, GABRA5, VAX1, ZIC1, SLC7A11, PCDH19, ZIC2, DLX2, ECE2, EPHA7, NDRG4, PHGDH, CNTNAP2, HAP1
GOTERM_BP_DIRECT	GO:0030855~epithelial cell differentiation	11	2.52874	2.92429e-06	FGFR2, GSTA1, AKR1C2, BARX1, RHCG, DLX6, DLX5, KRT14, UPK1B, BMP7, AKR1C1
GOTERM_BP_DIRECT	GO:0007411~axon guidance	10	2.29885	0.00876609	ZNF280A, WNT3A, DLX5, OTX2, DPYSL5, ARTN, VAX1, BMP7, FOXD1, GPC1
GOTERM_BP_DIRECT	GO:0008152~metabolic process	10	2.29885	0.0122882	GSTA1, UGT1A7, UGT1A10, UGT1A6, GSTM3, UGT1A9, UGT1A8, UGT1A3, UGT2A1, UGT1A1
GOTERM_BP_DIRECT	GO:0030198~extracellular matrix organization	10	2.29885	0.0299713	ITGA6, COL7A1, ADAMTS20, SERPINB5, WNT3A, C6ORF15, COL2A1, FBN2, COL4A6, COL4A5
GOTERM_BP_DIRECT	GO:0034220~ion transmembrane transport	10	2.29885	0.043238	TRDN, FXYD3, CLCA2, GABRR1, CLCA4, ATP4A, GABRA3, GABRA5, ATP12A, GABRQ
GOTERM_BP_DIRECT	GO:0009954~proximal/distal pattern formation	9	2.06897	2.78407e-08	HOXC10, DLX2, DLX1, HOXA11, HOXA10, TP63, EN1, HOXD10, LRP4
GOTERM_BP_DIRECT	GO:0030326~embryonic limb morphogenesis	9	2.06897	2.13893e-06	HOXC10, DLX6, HOXA11, DLX5, HOXA10, TP63, FBN2, BMP7, HOXD10
GOTERM_BP_DIRECT	GO:0009952~anterior/posterior pattern specification	9	2.06897	0.000374904	HOXC10, HOXC8, BARX1, HOXC13, OTX1, HOXA11, HOXA10, HOXD13, HOXD10
GOTERM_BP_DIRECT	GO:0009653~anatomical structure morphogenesis	9	2.06897	0.000958221	GPC3, HOXC13, HOXA11, FOXE1, SIX2, IGF2BP2, EN1, IGF2BP3, PITX1
GOTERM_BP_DIRECT	GO:0052695~cellular glucuronidation	8	1.83908	2.2976e-08	UGT1A7, UGT1A10, UGT1A6, UGT1A9, UGT1A8, UGT1A3, UGT2A1, UGT1A1
GOTERM_BP_DIRECT	GO:0052696~flavonoid glucuronidation	8	1.83908	3.05529e-07	UGT1A7, UGT1A10, UGT1A6, UGT1A9, UGT1A8, UGT1A3, UGT2A1, UGT1A1
GOTERM_BP_DIRECT	GO:0007154~cell communication	8	1.83908	1.66853e-05	GJB7, KREMEN2, OIP5, GJB4, GJB5, GJB6, NRG1, GJA3
GOTERM_BP_DIRECT	GO:0042472~inner ear morphogenesis	8	1.83908	0.000135744	FGFR2, DLX6, OTX1, WNT3A, USH1G, DLX5, COL2A1, ZIC1
GOTERM_BP_DIRECT	GO:0008584~male gonad development	8	1.83908	0.00472843	AKR1C3, STAR, HOXA11, HOXA10, SOX15, HMGA2, NR0B1, WNT2B
GOTERM_BP_DIRECT	GO:0007417~central nervous system development	8	1.83908	0.0169867	SH3GL3, NRCAM, ADAM23, PTPRZ1, POU6F2, GRHL3, COL2A1, TLX3
GOTERM_BP_DIRECT	GO:2001030~negative regulation of cellular glucuronidation	7	1.6092	2.96588e-09	UGT1A7, UGT1A10, UGT1A6, UGT1A9, UGT1A8, UGT1A3, UGT1A1
GOTERM_BP_DIRECT	GO:1904224~negative regulation of glucuronosyltransferase activity	7	1.6092	2.96588e-09	UGT1A7, UGT1A10, UGT1A6, UGT1A9, UGT1A8, UGT1A3, UGT1A1
GOTERM_BP_DIRECT	GO:0052697~xenobiotic glucuronidation	7	1.6092	8.73238e-09	UGT1A7, UGT1A10, UGT1A6, UGT1A9, UGT1A8, UGT1A3, UGT1A1
GOTERM_BP_DIRECT	GO:0045922~negative regulation of fatty acid metabolic process	7	1.6092	8.73238e-09	UGT1A7, UGT1A10, UGT1A6, UGT1A9, UGT1A8, UGT1A3, UGT1A1
GOTERM_BP_DIRECT	GO:0042573~retinoic acid metabolic process	7	1.6092	2.84275e-07	UGT1A7, UGT1A9, UGT1A8, UGT1A3, CYP26A1, ADH7, UGT1A1
GOTERM_BP_DIRECT	GO:0042475~odontogenesis of dentin-containing tooth	7	1.6092	0.0012818	DLX2, DLX1, AMTN, SOSTDC1, TP63, BMP7, LRP4
GOTERM_BP_DIRECT	GO:0007626~locomotory behavior	7	1.6092	0.0105737	C1QL1, CHRNB4, CHRNB2, NRG1, CALB1, HTR2C, CACNA1B
GOTERM_BP_DIRECT	GO:1902476~chloride transmembrane transport	7	1.6092	0.0168433	FXYD3, CLCA2, GABRR1, CLCA4, GABRA3, GABRA5, GABRQ
GOTERM_BP_DIRECT	GO:0010468~regulation of gene expression	7	1.6092	0.0232137	PTHLH, UTY, NELL1, SOX2, DDX3Y, PHGDH, COL2A1
GOTERM_BP_DIRECT	GO:0009813~flavonoid biosynthetic process	6	1.37931	5.96628e-05	UGT1A7, UGT1A10, UGT1A6, UGT1A3, UGT2A1, UGT1A1
GOTERM_BP_DIRECT	GO:0031069~hair follicle morphogenesis	6	1.37931	0.000273656	FGFR2, KRT17, SOSTDC1, FOXE1, TP63, TGM3
GOTERM_BP_DIRECT	GO:0045746~negative regulation of Notch signaling pathway	6	1.37931	0.000388258	DLX2, DLX1, NRARP, MAGEA1, DLK2, BMP7
GOTERM_BP_DIRECT	GO:0045669~positive regulation of osteoblast differentiation	6	1.37931	0.010248	NELL1, TP63, JAG1, FBN2, BMP7, GDPD2
GOTERM_BP_DIRECT	GO:0001523~retinoid metabolic process	6	1.37931	0.0109667	AKR1C3, GPC3, AKR1B10, ADH7, GPC1, AKR1C1
GOTERM_BP_DIRECT	GO:0007584~response to nutrient	6	1.37931	0.0236025	AKR1C3, GCLC, STAR, IGFBP2, UGT1A1, ALDH3A1
GOTERM_BP_DIRECT	GO:0030509~BMP signaling pathway	6	1.37931	0.0261343	RGMA, USP9Y, DLX5, BMP7, NKX2-5, LRP4
GOTERM_BP_DIRECT	GO:0006805~xenobiotic metabolic process	6	1.37931	0.0288332	UGT1A6, UGT1A9, CYP26A1, CYP2W1, AKR1C1, ALDH3A1
GOTERM_BP_DIRECT	GO:0051552~flavone metabolic process	5	1.14943	3.35971e-06	UGT1A7, UGT1A10, UGT1A9, UGT1A8, UGT1A1
GOTERM_BP_DIRECT	GO:0061436~establishment of skin barrier	5	1.14943	0.000555549	KRT16, ALOX12B, TP63, GRHL3, ALOX12
GOTERM_BP_DIRECT	GO:0017157~regulation of exocytosis	5	1.14943	0.00236202	CPLX2, RAB3B, RIMS2, HAP1, STXBP5L
GOTERM_BP_DIRECT	GO:0008202~steroid metabolic process	5	1.14943	0.0145539	AKR1C3, AKR1C2, UGT1A8, AKR1B10, UGT1A1
GOTERM_BP_DIRECT	GO:0050829~defense response to Gram-negative bacterium	5	1.14943	0.0328001	CHGA, IL22RA1, S100A7, RNASE7, NOS2
GOTERM_BP_DIRECT	GO:0007338~single fertilization	5	1.14943	0.0409132	FOXL2, HOXA11, FETUB, HOXA10, HOXD10
GOTERM_BP_DIRECT	GO:0044598~doxorubicin metabolic process	4	0.91954	0.000547288	AKR1C3, AKR1C2, AKR1B10, AKR1C1
GOTERM_BP_DIRECT	GO:0044597~daunorubicin metabolic process	4	0.91954	0.000547288	AKR1C3, AKR1C2, AKR1B10, AKR1C1
GOTERM_BP_DIRECT	GO:0050905~neuromuscular process	4	0.91954	0.00396482	HOXC10, UCHL1, FGF12, HOXD10
GOTERM_BP_DIRECT	GO:0045104~intermediate filament cytoskeleton organization	4	0.91954	0.00396482	KRT6C, KRT6A, KRT74, KRT16
GOTERM_BP_DIRECT	GO:0010466~negative regulation of peptidase activity	4	0.91954	0.00573535	GPC3, SERPINB4, SERPINB3, CSTA
GOTERM_BP_DIRECT	GO:0008089~anterograde axonal transport	4	0.91954	0.0189541	KIF1A, AP3B2, NEFL, HAP1
GOTERM_BP_DIRECT	GO:0006836~neurotransmitter transport	4	0.91954	0.0189541	CPLX2, SLC6A8, SLC6A15, GABRQ
GOTERM_BP_DIRECT	GO:0021983~pituitary gland development	4	0.91954	0.0231257	SOX2, HMGA2, NR0B1, PITX1
GOTERM_BP_DIRECT	GO:0030901~midbrain development	4	0.91954	0.0302395	FGFR2, OTX1, OTX2, EN1
GOTERM_BP_DIRECT	GO:0009953~dorsal/ventral pattern formation	4	0.91954	0.0328378	HOXA11, EN1, LRP4, HOXD11
GOTERM_BP_DIRECT	GO:0001837~epithelial to mesenchymal transition	4	0.91954	0.0383713	FGFR2, FAM83D, HMGA2, BMP7
GOTERM_BP_DIRECT	GO:0035094~response to nicotine	4	0.91954	0.047499	STAR, CHRNB4, CHRNB2, SLC7A11
GOTERM_BP_DIRECT	GO:0071395~cellular response to jasmonic acid stimulus	3	0.689655	0.00282115	AKR1C3, AKR1C2, AKR1C1
GOTERM_BP_DIRECT	GO:0048755~branching morphogenesis of a nerve	3	0.689655	0.00463347	FGFR2, DLX2, EPHA7
GOTERM_BP_DIRECT	GO:0035878~nail development	3	0.689655	0.0068492	ITGA6, HOXC13, FOXN1
GOTERM_BP_DIRECT	GO:0051798~positive regulation of hair follicle development	3	0.689655	0.0068492	KRT17, FST, FOXN1
GOTERM_BP_DIRECT	GO:0042035~regulation of cytokine biosynthetic process	3	0.689655	0.00944978	IGF2BP1, IGF2BP2, IGF2BP3
GOTERM_BP_DIRECT	GO:0060687~regulation of branching involved in prostate gland morphogenesis	3	0.689655	0.00944978	FGFR2, HOXD13, BMP7
GOTERM_BP_DIRECT	GO:0048762~mesenchymal cell differentiation	3	0.689655	0.0124173	FGFR2, HMGA2, BMP7
GOTERM_BP_DIRECT	GO:0048671~negative regulation of collateral sprouting	3	0.689655	0.0124173	RGMA, EPHA7, BCL11A
GOTERM_BP_DIRECT	GO:0042448~progesterone metabolic process	3	0.689655	0.0157344	AKR1C3, AKR1C2, AKR1C1
GOTERM_BP_DIRECT	GO:0043281~regulation of cysteine-type endopeptidase activity involved in apoptotic process	3	0.689655	0.0193842	EPHA7, SOX2, TP63
GOTERM_BP_DIRECT	GO:0060272~embryonic skeletal joint morphogenesis	3	0.689655	0.0233507	HOXA11, COL2A1, BMP7
GOTERM_BP_DIRECT	GO:0006600~creatine metabolic process	3	0.689655	0.0233507	CKMT1A, CKMT1B, SLC6A8
GOTERM_BP_DIRECT	GO:0031581~hemidesmosome assembly	3	0.689655	0.0276182	ITGA6, KRT5, KRT14
GOTERM_BP_DIRECT	GO:0060065~uterus development	3	0.689655	0.0369961	FOXL2, HOXA11, HOXA10
GOTERM_BP_DIRECT	GO:0002009~morphogenesis of an epithelium	3	0.689655	0.0369961	KRT6A, SERPINB5, KRT16
GOTERM_BP_DIRECT	GO:0016488~farnesol catabolic process	2	0.45977	0.0435844	AKR1C3, AKR1B10
GOTERM_BP_DIRECT	GO:0060529~squamous basal epithelial stem cell differentiation involved in prostate gland acinus development	2	0.45977	0.0435844	FGFR2, TP63
GOTERM_BP_DIRECT	GO:0021893~cerebral cortex GABAergic interneuron fate commitment	2	0.45977	0.0435844	DLX2, DLX1
GOTERM_BP_DIRECT	GO:0045939~negative regulation of steroid metabolic process	2	0.45977	0.0435844	UGT1A8, UGT1A1
GOTERM_BP_DIRECT	GO:0060512~prostate gland morphogenesis	2	0.45977	0.0435844	FGFR2, SERPINB5
GOTERM_CC_DIRECT	GO:0070062~extracellular exosome	84	19.3103	0.00264293	GDA, CKMT1B, S100A7, WNT3A, UCHL1, SLC7A8, KPRP, RASSF9, DLK2, CALB1, AKR1C3, GPX2, SLC16A1, GSTM3, GPC3, SBSN, RNASE7, SLC2A1, GPC1, AKR1C1, SH3GL3, GBP6, CLCA4, KRT13, KRT17, RHCG, SERPINB5, KRT16, TMPRSS11D, KRT15, AKR1B10, KRT14, SPRR3, CNTN1, SERPINB4, SERPINB3, CSTA, ALOX12, KRT6C, KRT6A, FXYD3, RAB3B, KRT6B, RIMS2, AHSG, IGSF11, RGMA, UGT1A6, PFN2, UGT1A9, KRT5, CALML3, UPK1B, TGM1, FAT2, …
GOTERM_CC_DIRECT	GO:0005576~extracellular region	55	12.6437	0.00119102	NXPH4, LYPD6, S100A7, WNT3A, NELL1, FST, JAG1, NRCAM, AADACL2, C17ORF99, RNASE7, PGLYRP3, FSTL5, KLK10, NRG1, CLCA2, STC2, KRTDAP, ARTN, C10ORF99, COLEC11, GAL, PTHLH, MMP10, UCN2, TMPRSS11D, TMPRSS11F, SERPINB2, TMPRSS11A, WFDC5, FGFR2, FAM132A, ADH7, GAST, COL2A1, POMC, ISM2, AHSG, COL7A1, FBN2, FGFBP1, KLK9, ADAM23, FETUB, A2ML1, COL4A6, WNT2B, COL4A5, CEL, SOST, TFRC, NTS, DSC3, BMP7, IGFBP2
GOTERM_CC_DIRECT	GO:0005615~extracellular space	52	11.954	9.94119e-05	LYPD3, WNT3A, FGF12, KRT33A, GPC3, SOSTDC1, NRG1, GPC1, INA, STC2, ATP4A, ADAMTS20, ARTN, C10ORF99, GAL, PTHLH, MMP10, CHGA, UCN2, SERPINB5, SERPINB2, SERPINB4, C1QL4, CSTA, SERPINB3, FAM132A, GAST, COL2A1, POMC, AHSG, ALDH3A1, COL7A1, SERPINB11, SERPINB13, FGFBP2, FGFBP1, KLK8, FETUB, LGALS7, KRT31, KRT34, A2ML1, WNT2B, TSLP, CEL, LGALS7B, SOST, TFRC, KRT78, IGFL1, BMP7, IGFBP2
GOTERM_CC_DIRECT	GO:0005887~integral component of plasma membrane	52	11.954	0.000327166	QRFPR, KCNH1, SLC13A5, SLC7A8, LPAR3, JAG1, CNGB3, NRCAM, SLC16A1, GPC3, SLC1A6, SLC2A1, NRG1, GPC1, CLCA2, CLCA4, ATP4A, CDHR1, UGT1A1, SLC7A11, GABRR1, CHRM3, RHCG, TMPRSS11D, TMPRSS11F, GPR50, TMPRSS11A, FGFR2, FXYD3, SLCO1A2, P2RY1, UPK1B, ADRA2B, SLC30A3, SLC39A2, GABRQ, PTH2R, ADAM23, PTPRZ1, GABRA3, GABRA5, SLC6A15, CEL, FZD10, EPHA7, TFRC, SLC6A8, NTRK2, CHRNB4, HTR2C, ABCC5, SLC5A12
GOTERM_CC_DIRECT	GO:0030054~cell junction	17	3.90805	0.04763	STON2, CLCA2, GABRA3, GABRA5, GJB6, RIMS2, GABRR1, SHISA9, SH2D5, CHRM3, SYN2, CHRNB4, CHRNB2, SLC30A3, PRIMA1, HAP1, GABRQ
GOTERM_CC_DIRECT	GO:0001533~cornified envelope	15	3.44828	6.29844e-13	LCE3D, SPRR2G, SPRR2F, SPRR2E, CRCT1, SPRR1A, SPRR2D, SPRR1B, SPRR2A, RPTN, TGM1, SPRR2B, SPRR3, SPRR4, CSTA
GOTERM_CC_DIRECT	GO:0005578~proteinaceous extracellular matrix	15	3.44828	0.00256137	AMTN, ADAMTS20, PTPRZ1, WNT3A, EMILIN3, COL4A6, COL4A5, WNT2B, MMP10, GPC3, SOST, RPTN, PI3, FBN2, GPC1
GOTERM_CC_DIRECT	GO:0030425~dendrite	15	3.44828	0.0168509	KCNH1, CPLX2, GABRA5, DPYSL5, TP63, CALB1, EPHA7, CHRM3, P2RY1, CNTNAP2, ADCY10, NRG1, HTR2C, LRP4, CACNA1B
GOTERM_CC_DIRECT	GO:0005882~intermediate filament	14	3.21839	1.22493e-06	KRT6C, KRT6A, KRT31, KRT13, KRT34, KRT33A, KRT75, KRT77, PKP1, KRT5, KRT17, KRT16, KRT15, KRT14
GOTERM_CC_DIRECT	GO:0031012~extracellular matrix	13	2.98851	0.0315074	FGFR2, MMP10, SOST, COL7A1, ADAMTS20, SBSN, DSG1, COL2A1, CSTA, FBN2, BMP7, EMILIN3, AHSG
GOTERM_CC_DIRECT	GO:0045211~postsynaptic membrane	11	2.52874	0.0187371	EPHA7, GABRR1, CHRM3, SH2D5, GABRA3, P2RY1, NTRK2, GABRA5, CHRNB4, CHRNB2, GABRQ
GOTERM_CC_DIRECT	GO:0045095~keratin filament	10	2.29885	0.000360046	KRT6C, KRT75, KRT6A, KRT74, KRT6B, KRT77, KRT5, KRT14, KRT78, KRT13
GOTERM_CC_DIRECT	GO:0016323~basolateral plasma membrane	9	2.06897	0.046027	TFRC, RHCG, CHRM3, SLC9A4, NDRG4, P2RY1, SLC2A1, SLC7A8, ATP12A
GOTERM_CC_DIRECT	GO:0031225~anchored component of membrane	8	1.83908	0.0124835	LYPD6B, RGMA, GPC3, CNTN5, LY6G6C, CNTN1, RAET1L, GPC1
GOTERM_CC_DIRECT	GO:0005581~collagen trimer	7	1.6092	0.015969	COL7A1, C1QL1, COL2A1, COLEC11, C1QL4, COL4A6, COL4A5
GOTERM_CC_DIRECT	GO:0005922~connexon complex	5	1.14943	0.00102708	GJB7, GJB4, GJB5, GJB6, GJA3
GOTERM_CC_DIRECT	GO:0030057~desmosome	5	1.14943	0.001731	PKP1, DSG3, DSG1, DSC3, DSC1
GOTERM_CC_DIRECT	GO:1904115~axon cytoplasm	5	1.14943	0.00705451	KIF1A, UCHL1, AP3B2, NEFL, HAP1
GOTERM_CC_DIRECT	GO:0034707~chloride channel complex	5	1.14943	0.022473	FXYD3, GABRR1, GABRA3, GABRA5, GABRQ
GOTERM_CC_DIRECT	GO:1902711~GABA-A receptor complex	4	0.91954	0.00674882	GABRR1, GABRA3, GABRA5, GABRQ
GOTERM_CC_DIRECT	GO:0030673~axolemma	3	0.689655	0.0472917	KCNH1, CNTNAP2, NRG1
GOTERM_MF_DIRECT	GO:0005198~structural molecule activity	32	7.35632	7.69617e-15	KRT6C, KRT6A, LCE3D, SPRR2G, SPRR2F, JAG1, SPRR2E, KRT33A, KRT5, SPRR2D, SPRR2A, SPRR2B, UPK1B, NEFL, KRT13, CLDN20, KRT34, KRT75, KRT74, CRCT1, KRT17, KRT77, SPRR1A, KRT16, SPRR1B, KRT15, KRT14, KRT78, SPRR3, SPRR4, CSTA, ADD2
GOTERM_MF_DIRECT	GO:0005509~calcium ion binding	31	7.12644	0.000861617	S100A7, NELL1, DLK2, JAG1, CALB1, NECAB2, CDH8, ANXA8, CALML3, RPTN, FAT2, FSTL5, TGM3, FBN2, S100A2, CAPNS2, CDHR1, LRP1B, PADI3, CHP2, CABYR, PCDH19, MMP10, DSG3, VSNL1, DSG1, DSC3, SYT14, DSC1, LRP4, CACNA1B
GOTERM_MF_DIRECT	GO:0003700~transcription factor activity, sequence-specific DNA binding	31	7.12644	0.044351	SOX21, POU6F2, E2F7, SOX2, HR, HOXD13, TP63, ZIC1, HOXD10, ZIC2, BARX1, HOXC8, SOX15, NKX2-5, FOXD1, PITX1, FOXL2, RCOR2, DMRT3, OTX1, TRIM29, OTX2, DMRT1, SIX2, DMRT2, DLX2, DLX6, BNC1, FOXE1, TBX18, TCF15
GOTERM_MF_DIRECT	GO:0043565~sequence-specific DNA binding	27	6.2069	0.000124114	IRX4, HOXA13, HOXA11, SOX2, TP63, HOXD10, HOXD11, HOXC8, HOXA10, TLX3, NKX2-5, FOXD1, PITX1, TLX1, FOXL2, EMX1, OTX1, OTX2, FOXN1, DMRT2, GRHL3, NR0B1, HOXC10, DLX1, DLX6, HOXC13, FOXE1
GOTERM_MF_DIRECT	GO:0042803~protein homodimerization activity	27	6.2069	0.0145398	FGFR2, USH1G, DLK2, UGT1A7, UGT1A6, SLC16A1, GSTM3, UGT1A9, UGT1A8, UGT1A3, BCL11A, NOS2, NKX2-5, ODC1, STC2, DMRT3, DMRT1, DMRT2, TPD52L1, NR0B1, UGT1A1, UGT1A10, TFRC, NTRK2, TBX18, LRP4, ADD2
GOTERM_MF_DIRECT	GO:0046982~protein heterodimerization activity	24	5.51724	0.000372577	KCNH1, GCLC, DMRT3, HIST1H2BH, DMRT1, TPD52L1, UGT1A1, CABYR, UGT1A7, UGT1A10, UGT1A6, UGT1A9, UGT1A8, UGT1A3, BCL11A, P2RY1, CHRNB4, SOX15, CHRNB2, NKX2-5, NEFL, TBX18, ADD2, BTBD11
GOTERM_MF_DIRECT	GO:0001077~transcriptional activator activity, RNA polymerase II core promoter proximal region sequence-specific binding	16	3.67816	0.000312183	FOXL2, OTX1, OTX2, SOX2, SIX2, TP63, HOXD13, HMGA2, ZIC1, HOXC13, DLX5, HOXA10, NKX2-5, FOXD1, PITX1, TLX1
GOTERM_MF_DIRECT	GO:0004867~serine-type endopeptidase inhibitor activity	10	2.29885	0.000337152	COL7A1, SERPINB5, PI3, SERPINB2, SERPINB11, SERPINB4, SERPINB13, SERPINB3, WFDC5, A2ML1
GOTERM_MF_DIRECT	GO:0005200~structural constituent of cytoskeleton	10	2.29885	0.000848608	INA, KRT6A, KRT6B, KRT17, KRT5, KRT16, KRT15, KRT14, KRT31, NEFL
GOTERM_MF_DIRECT	GO:0001972~retinoic acid binding	8	1.83908	4.97851e-07	UGT1A7, UGT1A10, UGT1A6, UGT1A9, UGT1A8, UGT1A3, CYP26A1, UGT1A1
GOTERM_MF_DIRECT	GO:0015020~glucuronosyltransferase activity	8	1.83908	2.82072e-06	UGT1A7, UGT1A10, UGT1A6, UGT1A9, UGT1A8, UGT1A3, UGT2A1, UGT1A1
GOTERM_MF_DIRECT	GO:0016758~transferase activity, transferring hexosyl groups	8	1.83908	3.60847e-06	UGT1A7, UGT1A6, UGT1A9, UGT1A8, UGT1A3, UGT2A1, UGT1A1, B4GALNT1
GOTERM_MF_DIRECT	GO:0005254~chloride channel activity	7	1.6092	0.00129807	FXYD3, CLCA2, GABRR1, CLCA4, GABRA3, GABRA5, GABRQ
GOTERM_MF_DIRECT	GO:0001228~transcriptional activator activity, RNA polymerase II transcription regulatory region sequence-specific binding	7	1.6092	0.0203419	DLX2, BARX1, DMRT1, HOXD13, GRHL3, NKX2-5, SOHLH1
GOTERM_MF_DIRECT	GO:0004869~cysteine-type endopeptidase inhibitor activity	6	1.37931	0.000915042	CARD18, FETUB, SERPINB13, SERPINB3, CSTA, AHSG
GOTERM_MF_DIRECT	GO:0008144~drug binding	6	1.37931	0.0283118	UGT1A7, UGT1A8, CHRM3, CHRNB4, CHRNB2, HTR2C
GOTERM_MF_DIRECT	GO:0005230~extracellular ligand-gated ion channel activity	5	1.14943	0.00617459	GABRR1, GABRA3, GABRA5, CHRNB4, GABRQ
GOTERM_MF_DIRECT	GO:0016705~oxidoreductase activity, acting on paired donors, with incorporation or reduction of molecular oxygen	5	1.14943	0.0392417	CYP2S1, CYP26A1, CYP4F11, CYP4F3, CYP2W1
GOTERM_MF_DIRECT	GO:0004890~GABA-A receptor activity	4	0.91954	0.00838903	GABRR1, GABRA3, GABRA5, GABRQ
GOTERM_MF_DIRECT	GO:0043236~laminin binding	4	0.91954	0.018031	LYPD3, ITGA6, C6ORF15, GPC1
GOTERM_MF_DIRECT	GO:0004857~enzyme inhibitor activity	4	0.91954	0.0293187	UGT1A7, UGT1A9, UGT1A8, UGT1A1
GOTERM_MF_DIRECT	GO:0047086~ketosteroid monooxygenase activity	3	0.689655	0.00149362	AKR1C3, AKR1C2, AKR1C1
GOTERM_MF_DIRECT	GO:0047718~indanol dehydrogenase activity	3	0.689655	0.00149362	AKR1C3, AKR1B10, AKR1C1
GOTERM_MF_DIRECT	GO:0047115~trans-1,2-dihydrobenzene-1,2-diol dehydrogenase activity	3	0.689655	0.00294273	AKR1C3, AKR1C2, AKR1C1
GOTERM_MF_DIRECT	GO:0018636~phenanthrene 9,10-monooxygenase activity	3	0.689655	0.00294273	AKR1C3, AKR1C2, AKR1C1
GOTERM_MF_DIRECT	GO:0045182~translation regulator activity	3	0.689655	0.00713979	IGF2BP1, IGF2BP2, IGF2BP3
GOTERM_MF_DIRECT	GO:0004032~alditol:NADP+ 1-oxidoreductase activity	3	0.689655	0.00984758	AKR1C3, AKR1C2, AKR1C1
GOTERM_MF_DIRECT	GO:0016655~oxidoreductase activity, acting on NAD(P)H, quinone or similar compound as acceptor	3	0.689655	0.0129359	AKR1C3, AKR1C2, AKR1C1
GOTERM_MF_DIRECT	GO:0048027~mRNA 5'-UTR binding	3	0.689655	0.0163863	IGF2BP1, IGF2BP2, IGF2BP3
GOTERM_MF_DIRECT	GO:0004033~aldo-keto reductase (NADP) activity	3	0.689655	0.0437397	AKR1C3, AKR1B10, AKR1C1
GOTERM_MF_DIRECT	GO:0045550~geranylgeranyl reductase activity	2	0.45977	0.0445156	AKR1C3, AKR1B10
KEGG_PATHWAY	hsa00980:Metabolism of xenobiotics by cytochrome P450	15	3.44828	2.806e-10	GSTA1, CYP2S1, ADH7, UGT1A1, ALDH3A1, UGT1A7, AKR1C2, UGT1A6, UGT1A10, UGT1A9, GSTM3, UGT1A8, UGT1A3, UGT2A1, AKR1C1
KEGG_PATHWAY	hsa04080:Neuroactive ligand-receptor interaction	14	3.21839	0.00547264	GABRR1, PTH2R, CHRM3, GABRA3, P2RY1, S1PR5, GABRA5, CHRNB4, LPAR3, GPR50, CHRNB2, ADRA2B, HTR2C, GABRQ
KEGG_PATHWAY	hsa00982:Drug metabolism - cytochrome P450	12	2.75862	1.36679e-07	GSTA1, UGT1A7, UGT1A10, UGT1A6, GSTM3, UGT1A9, UGT1A8, UGT1A3, UGT2A1, ADH7, UGT1A1, ALDH3A1
KEGG_PATHWAY	hsa05204:Chemical carcinogenesis	12	2.75862	7.52294e-07	GSTA1, UGT1A7, UGT1A10, UGT1A6, GSTM3, UGT1A9, UGT1A8, UGT1A3, UGT2A1, ADH7, UGT1A1, ALDH3A1
KEGG_PATHWAY	hsa00140:Steroid hormone biosynthesis	11	2.52874	2.78838e-07	AKR1C3, UGT1A7, UGT1A10, UGT1A6, AKR1C2, UGT1A9, UGT1A8, UGT1A3, UGT2A1, UGT1A1, AKR1C1
KEGG_PATHWAY	hsa00830:Retinol metabolism	11	2.52874	7.26579e-07	UGT1A7, UGT1A10, UGT1A6, UGT1A9, UGT1A8, UGT1A3, CYP2S1, CYP26A1, UGT2A1, ADH7, UGT1A1
KEGG_PATHWAY	hsa00040:Pentose and glucuronate interconversions	9	2.06897	2.85603e-07	UGT1A7, UGT1A10, UGT1A6, UGT1A9, UGT1A8, UGT1A3, AKR1B10, UGT2A1, UGT1A1
KEGG_PATHWAY	hsa00053:Ascorbate and aldarate metabolism	8	1.83908	9.9782e-07	UGT1A7, UGT1A10, UGT1A6, UGT1A9, UGT1A8, UGT1A3, UGT2A1, UGT1A1
KEGG_PATHWAY	hsa00860:Porphyrin and chlorophyll metabolism	8	1.83908	2.32642e-05	UGT1A7, UGT1A10, UGT1A6, UGT1A9, UGT1A8, UGT1A3, UGT2A1, UGT1A1
KEGG_PATHWAY	hsa00983:Drug metabolism - other enzymes	8	1.83908	4.30158e-05	UGT1A7, UGT1A10, UGT1A6, UGT1A9, UGT1A8, UGT1A3, UGT2A1, UGT1A1
KEGG_PATHWAY	hsa05146:Amoebiasis	8	1.83908	0.00685874	SERPINB2, COL2A1, SERPINB4, SERPINB13, SERPINB3, NOS2, COL4A6, COL4A5
KEGG_PATHWAY	hsa04550:Signaling pathways regulating pluripotency of stem cells	8	1.83908	0.0281026	FGFR2, FZD10, OTX1, WNT3A, DLX5, SOX2, DUSP9, WNT2B
KEGG_PATHWAY	hsa04727:GABAergic synapse	7	1.6092	0.00883009	GABRR1, ADCY8, GABRA3, GABRA5, HAP1, GABRQ, CACNA1B
KEGG_PATHWAY	hsa05033:Nicotine addiction	6	1.37931	0.00141046	GABRR1, GABRA3, GABRA5, CHRNB2, GABRQ, CACNA1B
KEGG_PATHWAY	hsa04971:Gastric acid secretion	6	1.37931	0.0185279	CHRM3, ATP4A, CALML3, SLC9A4, ADCY8, GAST
KEGG_PATHWAY	hsa05032:Morphine addiction	6	1.37931	0.042607	GABRR1, ADCY8, GABRA3, GABRA5, GABRQ, CACNA1B
KEGG_PATHWAY	hsa00480:Glutathione metabolism	5	1.14943	0.0220071	GSTA1, GPX2, ODC1, GSTM3, GCLC
KEGG_PATHWAY	hsa00590:Arachidonic acid metabolism	5	1.14943	0.0391674	AKR1C3, GPX2, ALOX12B, CYP4F3, ALOX12

## Sheet: Upgrade DEGs in ESR1 group
Category	Term	Count	%	PValue	Genes
GOTERM_BP_DIRECT	GO:0007165~signal transduction	69	9.77337	0.000134719	DLC1, GNA14, CLDN3, CRABP2, RRAD, TLR3, ARHGAP15, SHE, ADORA1, PGR, WISP2, ARHGAP20, LILRA2, PPP1R1B, PLA2G1B, CSF3R, CEACAM6, LTB, PAG1, SPN, UNC5CL, TNFRSF17, NLRP3, CNGA3, CDKL2, TRAT1, TNFRSF10C, CCR6, TNFSF13B, RASGRF1, ARRB1, TNFSF12-TNFSF13, NRGN, MST1R, CLEC5A, ITGAL, C3, NR3C2, NOSTRIN, KIT, GPRC5A, APBB1IP, CD74, CCL22, TAGAP, FGG, CCL23, CCL20, FGA, CD69, FGB, IL2RG, CD4, HLA-DOA, HTR3…
GOTERM_BP_DIRECT	GO:0006955~immune response	60	8.49858	7.81616e-19	CHIA, SUSD2, HLA-DMB, HLA-DMA, CXCR5, MS4A2, LTB, SPN, CIITA, PRG4, NCF4, PRG2, CTSS, HLA-DQA2, HLA-DQA1, CTSW, NCR3, C8B, CCR7, TNFRSF10C, CCR6, TNFSF13B, CCR5, CD40LG, CCR4, CCR2, HLA-DPA1, TNFSF12-TNFSF13, HLA-DRA, HLA-DQB1, C7, GPR183, HLA-DQB2, HLA-DRB1, C3, ENPP3, CXCL2, CD74, CHIT1, CCL22, CCL23, CCL20, CD22, HLA-DRB5, IL2RG, CD4, HLA-DPB1, HLA-DOA, FYB, CRIP1, TLR10, CR2, CCL19, CD1A, CD1…
GOTERM_BP_DIRECT	GO:0007155~cell adhesion	49	6.94051	1.07582e-10	CXCR3, AZGP1, WISP2, CSF3R, SPON1, ICAM1, ICAM4, SIGLEC14, NCAM2, PGM5, SIGLEC6, SIGLEC5, CX3CR1, MFAP4, AOC3, ITGAL, ACHE, PLXNC1, CYP1B1, NINJ2, ITGB2, ITGB3, ITGAM, ITGBL1, PCDHAC1, VCAM1, COL6A6, SORBS2, COMP, MYBPH, ITGB6, MSLN, CD2, CD22, CD4, COL8A1, SELPLG, THBS4, DPT, COL4A3, TNXB, OLR1, SELL, ITGA9, OMD, CASS4, ITGA8, MUC16, HABP2
GOTERM_BP_DIRECT	GO:0006954~inflammatory response	45	6.37394	2.20414e-11	ITGAL, PTGS2, C3, LY86, CXCL2, TLR3, ITGB2, CXCR3, KIT, ADORA1, TLR7, CCL22, CCL23, SMPDL3B, CCL20, ITGB6, MS4A2, ADAM8, CSF1R, CIITA, PIK3CG, PTGER2, TLR10, OLR1, C4A, NOX1, LYZ, CCL19, NLRP3, CD180, NCR3, CCL17, SIGLEC1, ORM1, TNFRSF10C, CYBB, CCL13, CCR7, CCL14, CCR5, CD40LG, CCR4, CCR2, AOX1, AOC3
GOTERM_BP_DIRECT	GO:0045087~innate immune response	37	5.24079	5.36527e-06	C6, LY86, BLK, TLR3, TLR7, CLEC10A, BTK, MARCO, FGA, SMPDL3B, FGB, SFTPD, CFI, CSF1R, ZBP1, PIK3CG, ITK, CR1, TLR10, CR2, C4A, SLAMF6, C4BPB, COLEC12, C4BPA, SIGLEC14, NLRP3, CD180, CD84, CD55, CYBB, S100B, MST1R, TREM1, CLEC5A, SSC5D, DMBT1
GOTERM_BP_DIRECT	GO:0006508~proteolysis	36	5.09915	0.000279575	C3, ADAMTS16, PGC, MMP7, MMP28, FCN1, PIP, LTF, CPA3, FGL2, LONRF3, CFI, ADAM8, DPP4, ADAM28, TMPRSS2, HPN, OLR1, C4A, CFB, CAPN8, CAPN9, UNC5CL, NAPSA, CTSS, MMP13, TMPRSS6, TMPRSS3, GZMK, ADAMTS8, F5, CAPN13, UBD, CPB2, WFDC2, HABP2
GOTERM_BP_DIRECT	GO:0055114~oxidation-reduction process	34	4.81586	0.0138738	STEAP4, CYP24A1, ME3, CYP1B1, PTGS2, KMO, VCAM1, FMO5, DMGDH, HSD17B6, SDR16C5, HHIP, CHDH, CYP21A2, MICAL2, NCF4, NOX1, HGD, DDO, MOXD1, ALDH3B1, SOD3, IYD, CYP4B1, CYBB, ALOX15B, AOX1, ALOX5, DPYD, CP, DIO1, HPGD, CRYM, AOC3
GOTERM_BP_DIRECT	GO:0043547~positive regulation of GTPase activity	33	4.67422	0.0128519	DLC1, A2M, RGL3, KIT, ARHGAP15, DOCK2, TAGAP, CCL22, CCL23, ARHGAP20, CCL20, PLEKHG7, RGN, IL2RG, DOCK10, KNDC1, CSF2RA, ARHGDIB, ICAM1, ARHGEF38, NCKAP1L, CCL19, RGS17, DOCK8, CCL17, P2RY12, RGS22, CCL13, CCL14, EREG, RASGRF1, ARRB1, LRRK2
GOTERM_BP_DIRECT	GO:0030198~extracellular matrix organization	24	3.39943	1.16915e-06	COL4A4, COL4A3, ICAM1, ITGAL, ICAM4, NOX1, ELN, ITGB2, ITGB3, TMPRSS6, ITGAM, ABI3BP, KDR, VCAM1, ITGA9, FGG, COL14A1, FGA, FGB, COMP, ITGA8, ITGB6, COL8A1, COL10A1
GOTERM_BP_DIRECT	GO:0002250~adaptive immune response	22	3.11615	1.41279e-07	PIK3CG, GPR183, ITK, TNFRSF13B, CD1C, CD1B, TNFRSF17, CD1A, CTSS, CLEC10A, CD1E, TRAT1, BTK, CD84, BTLA, LAT2, FGA, LILRA2, FGB, CD4, CD79A, PAG1
GOTERM_BP_DIRECT	GO:0031295~T cell costimulation	21	2.9745	5.20676e-12	HLA-DQB1, HLA-DQB2, CD3G, CD3D, HLA-DRB1, CD3E, CCL19, HLA-DQA2, HLA-DQA1, BTLA, TNFSF13B, CD40LG, HHLA2, HLA-DRB5, HLA-DPA1, CD4, HLA-DPB1, CD5, DPP4, SPN, HLA-DRA
GOTERM_BP_DIRECT	GO:0006935~chemotaxis	21	2.9745	2.38861e-08	RNASE2, CYSLTR1, CXCL2, NCKAP1L, CXCR3, CCL17, CXCL17, DOCK2, CCL22, CCL13, CCR7, CCL23, CCR6, CCR5, CCL20, CXCR5, CCR4, CCR2, CX3CR1, SERPIND1, SPN
GOTERM_BP_DIRECT	GO:0050776~regulation of immune response	21	2.9745	1.11387e-05	KLRB1, ICAM1, ITGAL, CD3G, ICAM4, CD3D, SELL, C3, CD3E, SLAMF6, CD1C, CD1B, ITGB2, CD1A, NCR3, VCAM1, CD19, FCGR2B, CD40LG, SFTPD, TREM1
GOTERM_BP_DIRECT	GO:0007267~cell-cell signaling	21	2.9745	0.00138243	BMP3, GDF5, FCRL2, ITGB2, ADORA1, GJB1, CCL17, TNFSF8, PGR, CCL22, WISP2, CCL13, CCL23, CCR5, CCL20, EREG, SIGLEC6, AGT, ADRA1B, CEACAM6, LTB
GOTERM_BP_DIRECT	GO:0070374~positive regulation of ERK1 and ERK2 cascade	20	2.83286	2.98075e-05	ICAM1, GPR183, PTPN22, CCL19, CD74, KDR, CCL17, CCR7, CCL22, FGG, CCL13, CCL23, CCL14, FGA, CCL20, FGB, ARRB1, PLA2G2A, PDGFD, CSF1R
GOTERM_BP_DIRECT	GO:0006898~receptor-mediated endocytosis	20	2.83286	6.90088e-05	MRC1, TMPRSS2, OLR1, PRG4, ENPP3, SUSD2, HP, COLEC12, TMPRSS3, MARCO, CD207, FOLR1, SFTPD, SCGB3A2, CFI, LRP2, SCARA5, CD5, SSC5D, DMBT1
GOTERM_BP_DIRECT	GO:0007166~cell surface receptor signaling pathway	20	2.83286	0.0072467	KLRB1, COL4A3, PTPRC, CD3G, CYSLTR1, CD3D, CD3E, TNFRSF13B, TSPAN8, CXCR3, BIRC3, SCTR, MARCO, CD37, CD19, CCR5, AGT, CD2, CD4, SPN
GOTERM_BP_DIRECT	GO:0050852~T cell receptor signaling pathway	19	2.69122	1.02041e-05	HLA-DQB1, FYB, PTPRC, HLA-DQB2, ITK, CD3G, HLA-DRB1, CD3D, CD3E, PTPN22, HLA-DQA2, HLA-DQA1, TRAT1, HLA-DRB5, HLA-DPA1, CD4, HLA-DPB1, PAG1, HLA-DRA
GOTERM_BP_DIRECT	GO:0055085~transmembrane transport	19	2.69122	0.00469157	ABCA8, SPNS3, SLC44A4, CFTR, ABCA4, ABCA3, GJA5, ABCA6, GJB1, AZGP1, SLC41A2, PIP, SLC18A2, SLC5A8, ABCC3, SLC22A3, SLC46A2, ABCC6, SLC43A3
GOTERM_BP_DIRECT	GO:0007596~blood coagulation	17	2.40793	0.00147325	NFE2, ENPP4, C4BPB, ITGB3, DOCK8, P2RY12, FGG, F5, FGA, FGB, TFPI, SERPINA1, SERPIND1, PDGFD, TFPI2, CPB2, PAPSS2
GOTERM_BP_DIRECT	GO:0007169~transmembrane receptor protein tyrosine kinase signaling pathway	16	2.26629	2.51704e-06	ITK, STAP1, CD3E, FLT3, BLK, KIT, TRAT1, KDR, BTK, DOK5, ROR1, ANGPTL1, CD4, ROS1, PAG1, CSF1R
GOTERM_BP_DIRECT	GO:0001525~angiogenesis	16	2.26629	0.0202268	PIK3CG, CYP1B1, PTGS2, NOX1, CXCR3, TMPRSS6, GJA5, KDR, CXCL17, MEOX2, EREG, PIK3R6, TNFSF12-TNFSF13, TMEM100, ADAM8, COL8A1
GOTERM_BP_DIRECT	GO:0070098~chemokine-mediated signaling pathway	15	2.12465	2.92569e-07	CXCL2, CCL19, CXCR3, CCL17, CCL22, CCL13, CCL23, CCR6, CCL14, CCL20, CXCR5, CCR5, CCR4, CCR2, CX3CR1
GOTERM_BP_DIRECT	GO:0019886~antigen processing and presentation of exogenous peptide antigen via MHC class II	15	2.12465	7.44514e-06	HLA-DQB1, HLA-DQB2, HLA-DRB1, CTSS, HLA-DMB, HLA-DMA, HLA-DQA2, CD74, HLA-DQA1, CTSE, HLA-DRB5, HLA-DPA1, HLA-DPB1, HLA-DOA, HLA-DRA
GOTERM_BP_DIRECT	GO:0044267~cellular protein metabolic process	15	2.12465	0.000126698	LYZ, NAPSA, SFTPA1, MMP13, ABCA3, SLC34A2, FGA, SFTPA2, SFTPD, SFTA3, SFTPC, LTF, SFTPB, CSF2RA, DMBT1
GOTERM_BP_DIRECT	GO:0050900~leukocyte migration	15	2.12465	0.000181171	ICAM1, ITGAL, OLR1, FOXJ1, SELL, ITGB2, ITGB3, ITGAM, CD74, CD84, CD2, CEACAM6, TREM1, SELPLG, SPN
GOTERM_BP_DIRECT	GO:0019221~cytokine-mediated signaling pathway	15	2.12465	0.000381672	FLRT3, STAT4, PODN, EREG, FLT3, CCR2, TGM2, CSF3R, RTN4RL2, KIT, LRRC15, CSF2RA, CISH, CSF1R, IL22RA2
GOTERM_BP_DIRECT	GO:0030593~neutrophil chemotaxis	13	1.84136	5.05142e-06	PIK3CG, NCKAP1L, ITGB2, CCL17, ITGA9, CCL22, CCL13, CCL23, CCL14, CCL20, PLA2G1B, CSF3R, TREM1
GOTERM_BP_DIRECT	GO:0060333~interferon-gamma-mediated signaling pathway	13	1.84136	1.1083e-05	CIITA, HLA-DQB1, HLA-DQB2, ICAM1, HLA-DRB1, HLA-DQA2, HLA-DQA1, VCAM1, HLA-DRB5, HLA-DPA1, HLA-DPB1, IRF4, HLA-DRA
GOTERM_BP_DIRECT	GO:0045766~positive regulation of angiogenesis	13	1.84136	0.00120631	CYBB, CYP1B1, C3, LRG1, C6, CX3CR1, ITGB2, CXCR3, TNFSF12-TNFSF13, PIK3R6, AQP1, DDAH1, KDR
GOTERM_BP_DIRECT	GO:0010951~negative regulation of endopeptidase activity	13	1.84136	0.00187176	COL4A3, A2M, C4A, CPAMD8, C3, AGT, TFPI, ITIH5, SERPINA1, SERPIND1, TFPI2, WFDC2, WFDC3
GOTERM_BP_DIRECT	GO:0007204~positive regulation of cytosolic calcium ion concentration	13	1.84136	0.0043607	PIK3CG, CCR7, PTGER2, CD55, CCR6, CCR5, CYSLTR1, CCR4, AGT, CCR2, ADRA1B, CD52, CXCR3
GOTERM_BP_DIRECT	GO:0002504~antigen processing and presentation of peptide or polysaccharide antigen via MHC class II	12	1.69972	1.78983e-12	HLA-DQB1, HLA-DQB2, HLA-DRB1, HLA-DRB5, HLA-DPA1, HLA-DPB1, HLA-DMB, HLA-DOA, HLA-DMA, HLA-DQA2, HLA-DQA1, HLA-DRA
GOTERM_BP_DIRECT	GO:0019882~antigen processing and presentation	12	1.69972	4.75461e-06	HLA-DQB1, AZGP1, HLA-DRB1, HLA-DRB5, HLA-DPA1, CTSS, HLA-DPB1, HLA-DMB, HLA-DQA2, HLA-DQA1, CD74, HLA-DRA
GOTERM_BP_DIRECT	GO:0071346~cellular response to interferon-gamma	12	1.69972	6.85198e-06	CIITA, MRC1, CCL13, CCL22, CCL23, CCL14, CCL20, AQP4, TLR3, CCL19, HLA-DPA1, CCL17
GOTERM_BP_DIRECT	GO:0042102~positive regulation of T cell proliferation	12	1.69972	1.14988e-05	VCAM1, PTPRC, TNFSF13B, CD3E, CD40LG, NCKAP1L, CCL19, CD4, HLA-DPA1, HLA-DPB1, HLA-DMB, SPN
GOTERM_BP_DIRECT	GO:0007160~cell-matrix adhesion	12	1.69972	0.000508491	VCAM1, SIGLEC1, ITGAL, FGG, FGA, SNED1, FGB, ITGA8, MSLN, ITGB6, ITGB2, ITGB3
GOTERM_BP_DIRECT	GO:0008360~regulation of cell shape	12	1.69972	0.0157354	DLC1, ICAM1, CCL13, HPN, S100B, ATP10A, SEMA3E, ITGB2, KIT, ARHGAP15, CSF1R, KDR
GOTERM_BP_DIRECT	GO:0030449~regulation of complement activation	11	1.55807	7.38211e-08	C8B, C7, CR1, CD55, C4A, C3, CFB, C6, C4BPB, CFI, C4BPA
GOTERM_BP_DIRECT	GO:0006952~defense response	11	1.55807	0.000175823	CD84, KCNN4, LILRA2, CYSLTR1, CSF3R, HP, COLEC12, MST1R, NLRP3, CD74, SP140
GOTERM_BP_DIRECT	GO:0050729~positive regulation of inflammatory response	11	1.55807	0.000360596	CCL13, TLR10, CCL23, CCL14, AGT, CCR2, PLA2G2A, NLRP12, TGM2, TLR3, TLR7
GOTERM_BP_DIRECT	GO:0006958~complement activation, classical pathway	11	1.55807	0.00381733	C8B, C7, CR1, CD55, CR2, C4A, C3, C6, C4BPB, CFI, C4BPA
GOTERM_BP_DIRECT	GO:0002576~platelet degranulation	11	1.55807	0.00506634	ORM1, FGG, A2M, F5, FGA, FGB, APOH, SERPINA1, ITGB3, ORM2, CTSW
GOTERM_BP_DIRECT	GO:0050853~B cell receptor signaling pathway	10	1.41643	0.000155586	MEF2C, PTPRC, LAT2, CD19, BLK, MNDA, NCKAP1L, CD79A, NFATC2, BTK
GOTERM_BP_DIRECT	GO:0006968~cellular defense response	10	1.41643	0.000455506	ITK, CD19, CCR6, CCR5, CCR2, CX3CR1, MNDA, CLEC5A, TRAT1, SPN
GOTERM_BP_DIRECT	GO:0071347~cellular response to interleukin-1	10	1.41643	0.00124291	ICAM1, CCL13, CCL22, CCL23, CCL14, CCL20, FGB, TFPI, CCL19, CCL17
GOTERM_BP_DIRECT	GO:0046718~viral entry into host cell	10	1.41643	0.00288006	MRC1, ICAM1, CR1, CD55, CR2, ITGB6, ITGB3, CLEC5A, SELPLG, DPP4
GOTERM_BP_DIRECT	GO:0071222~cellular response to lipopolysaccharide	10	1.41643	0.0253743	MRC1, MEF2C, ICAM1, STAP1, CCR5, CCL20, CX3CR1, TFPI, NLRP3, CD180
GOTERM_BP_DIRECT	GO:0030168~platelet activation	10	1.41643	0.0280251	PIK3CG, GNA14, FGG, F5, FGA, FGB, CD40LG, ARRB1, PIK3R6, ITGB3
GOTERM_BP_DIRECT	GO:0016266~O-glycan processing	9	1.27479	0.00165017	MUC1, GCNT3, MUC21, B3GNT7, B3GNT6, B3GNT3, MUC13, MUC5B, MUC16
GOTERM_BP_DIRECT	GO:0060326~cell chemotaxis	9	1.27479	0.00276741	VCAM1, CCL13, CCL14, CCR6, CCL20, CXCL2, CCL19, KIT, BIN2
GOTERM_BP_DIRECT	GO:0006869~lipid transport	9	1.27479	0.00724455	ABCA8, SPNS3, SFTPA1, ABCA4, GPIHBP1, ABCA3, ABCA6, SLCO2A1, ESYT3
GOTERM_BP_DIRECT	GO:0006874~cellular calcium ion homeostasis	9	1.27479	0.0226884	CCL13, CCL23, CCL14, TRPM8, PLN, CCR2, RGN, CCL19, ATP13A4
GOTERM_BP_DIRECT	GO:0007229~integrin-mediated signaling pathway	9	1.27479	0.0315116	ITGA9, ITGAL, ITGA8, ITGB6, ITGB2, ITGB3, ADAM8, ITGAM, ITGBL1
GOTERM_BP_DIRECT	GO:0016337~single organismal cell-cell adhesion	9	1.27479	0.0349107	VCAM1, ICAM1, SIGLEC1, COL14A1, ICAM4, ITGA8, CD2, GPA33, ADAM8
GOTERM_BP_DIRECT	GO:0048247~lymphocyte chemotaxis	8	1.13314	5.78041e-05	CCL13, CCL22, CCL23, CCL14, CCL20, CCL19, ADAM8, CCL17
GOTERM_BP_DIRECT	GO:0007585~respiratory gaseous exchange	8	1.13314	0.000216233	CYSLTR1, SFTPA2, ELN, SFTPD, SFTPC, CFTR, SFTPA1, SFTPB
GOTERM_BP_DIRECT	GO:0042110~T cell activation	8	1.13314	0.00166294	PIK3CG, ITK, CD3G, CD3E, CD2, IRF4, DPP4, HSH2D
GOTERM_BP_DIRECT	GO:0006959~humoral immune response	8	1.13314	0.00507722	MEF2C, GPR183, CCR6, FOXJ1, LY86, MS4A1, LTF, TREM1
GOTERM_BP_DIRECT	GO:0043406~positive regulation of MAP kinase activity	8	1.13314	0.00614702	PIK3CG, MEF2C, FLT3, PDGFD, MST1R, KIT, PIK3R6, LRRK2
GOTERM_BP_DIRECT	GO:0016525~negative regulation of angiogenesis	8	1.13314	0.0080552	COL4A3, AGT, CCR2, SEMA3E, CX3CR1, APOH, CXCR3, THBS4
GOTERM_BP_DIRECT	GO:0007586~digestion	8	1.13314	0.00877887	CHIA, CAPN8, PGC, CAPN9, CTSE, AMY2B, AMY1A, SCTR
GOTERM_BP_DIRECT	GO:0030574~collagen catabolic process	8	1.13314	0.00954912	COL4A4, COL4A3, COL6A6, MMP7, CTSS, COL8A1, MMP13, COL10A1
GOTERM_BP_DIRECT	GO:0050731~positive regulation of peptidyl-tyrosine phosphorylation	8	1.13314	0.0331448	FCER1A, ICAM1, CD3E, AGT, CD4, ITGB3, CD74, THBS4
GOTERM_BP_DIRECT	GO:0006928~movement of cell or subcellular component	8	1.13314	0.0413435	ITGAL, DNALI1, CCR6, CXCR5, PTGS2, MST1R, CXCR3, ARHGDIB
GOTERM_BP_DIRECT	GO:0002407~dendritic cell chemotaxis	7	0.991501	2.28126e-05	PIK3CG, GPR183, CCR7, CCR6, CCR5, CCR2, CCL19
GOTERM_BP_DIRECT	GO:0045907~positive regulation of vasoconstriction	7	0.991501	0.00103706	ICAM1, FGG, FGA, PTGS2, FGB, ADRA1B, GJA5
GOTERM_BP_DIRECT	GO:0050714~positive regulation of protein secretion	7	0.991501	0.00196479	KCNN4, ACHE, FGG, FGA, FGB, PLA2G1B, ADAM8
GOTERM_BP_DIRECT	GO:0030890~positive regulation of B cell proliferation	7	0.991501	0.00299465	MEF2C, PTPRC, GPR183, TNFSF13B, NCKAP1L, NFATC2, CD74
GOTERM_BP_DIRECT	GO:0002548~monocyte chemotaxis	7	0.991501	0.00438223	CCL13, CCL22, CCL23, CCL14, CCL20, CCL19, CCL17
GOTERM_BP_DIRECT	GO:0008015~blood circulation	7	0.991501	0.0061942	COL4A3, NFE2, F5, OLR1, MEOX2, PLN, ELN
GOTERM_BP_DIRECT	GO:0007157~heterophilic cell-cell adhesion via plasma membrane cell adhesion molecules	7	0.991501	0.0103389	VCAM1, ICAM1, AMIGO2, ITGAL, CADM3, FAT4, NCR3
GOTERM_BP_DIRECT	GO:0019722~calcium-mediated signaling	7	0.991501	0.0113584	LAT2, PPP1R9A, CCR6, CCR5, CXCR3, LRRK2, BTK
GOTERM_BP_DIRECT	GO:0097190~apoptotic signaling pathway	7	0.991501	0.0487642	CD3E, TLR3, TNFSF12-TNFSF13, ADORA1, CD5, SPN, BTK
GOTERM_BP_DIRECT	GO:0071260~cellular response to mechanical stimulus	7	0.991501	0.0487642	PTGS2, AGT, MMP7, TLR3, ATP1A2, AQP1, TLR7
GOTERM_BP_DIRECT	GO:0019372~lipoxygenase pathway	6	0.849858	7.10866e-05	PTGS2, ALOX15B, ALOX5AP, ALOX5, LTC4S, HPGD
GOTERM_BP_DIRECT	GO:0006833~water transport	6	0.849858	0.000689298	AQP5, AQP4, AQP7, UPK3A, AQP1, AQP3
GOTERM_BP_DIRECT	GO:0019370~leukotriene biosynthetic process	6	0.849858	0.000689298	FCER1A, ALOX5AP, PLA2G1B, GGTLC1, ALOX5, LTC4S
GOTERM_BP_DIRECT	GO:0090023~positive regulation of neutrophil chemotaxis	6	0.849858	0.0011007	CCR7, CXCL2, NCKAP1L, CCL19, CD74, THBS4
GOTERM_BP_DIRECT	GO:0007159~leukocyte cell-cell adhesion	6	0.849858	0.00202476	VCAM1, ICAM1, ITGAL, CD40LG, ITGB2, NT5E
GOTERM_BP_DIRECT	GO:0042100~B cell proliferation	6	0.849858	0.00619313	MEF2C, PTPRC, CR2, CD40LG, MS4A1, CD79A
GOTERM_BP_DIRECT	GO:0007588~excretion	6	0.849858	0.0115129	KCNK5, AQP5, AQP7, SCNN1B, AQP3, SCTR
GOTERM_BP_DIRECT	GO:0070527~platelet aggregation	6	0.849858	0.0175346	PIK3CG, P2RY12, FGG, FGA, FGB, ITGB3
GOTERM_BP_DIRECT	GO:0045860~positive regulation of protein kinase activity	6	0.849858	0.0299582	PTPRC, PPP1R9A, CCR7, EREG, CCL19, CD4
GOTERM_BP_DIRECT	GO:0045060~negative thymic T cell selection	5	0.708215	0.000511989	DOCK2, CCR7, CD3E, CD74, SPN
GOTERM_BP_DIRECT	GO:0015793~glycerol transport	5	0.708215	0.00104512	AQP5, AQP4, AQP7, AQP1, AQP3
GOTERM_BP_DIRECT	GO:0009992~cellular water homeostasis	5	0.708215	0.00104512	AQP5, AQP4, AQP7, AQP1, AQP3
GOTERM_BP_DIRECT	GO:0035589~G-protein coupled purinergic nucleotide receptor signaling pathway	5	0.708215	0.00142029	P2RY12, P2RY13, P2RY6, P2RY10, GPR171
GOTERM_BP_DIRECT	GO:0001782~B cell homeostasis	5	0.708215	0.00385631	GAPT, MEF2C, TNFSF13B, TNFRSF13B, NCKAP1L
GOTERM_BP_DIRECT	GO:0042346~positive regulation of NF-kappaB import into nucleus	5	0.708215	0.00690366	PTGS2, C8ORF4, TLR3, CCL19, TLR7
GOTERM_BP_DIRECT	GO:0045921~positive regulation of exocytosis	5	0.708215	0.00690366	FGG, FGA, CADPS2, FGB, CFTR
GOTERM_BP_DIRECT	GO:0042730~fibrinolysis	5	0.708215	0.00690366	FGG, FGA, FGB, TMPRSS6, CPB2
GOTERM_BP_DIRECT	GO:0045332~phospholipid translocation	5	0.708215	0.0081932	KCNN4, ATP10A, ATP11A, ABCA4, ATP8A1
GOTERM_BP_DIRECT	GO:0010719~negative regulation of epithelial to mesenchymal transition	5	0.708215	0.0081932	VASN, HPN, FOXA2, NKX2-1, BMP5
GOTERM_BP_DIRECT	GO:0001816~cytokine production	5	0.708215	0.0129752	PIK3CG, BATF, ITK, CD4, NFATC2
GOTERM_BP_DIRECT	GO:0002224~toll-like receptor signaling pathway	5	0.708215	0.0169791	TLR10, TLR3, CTSS, TLR7, CD180
GOTERM_BP_DIRECT	GO:0010575~positive regulation of vascular endothelial growth factor production	5	0.708215	0.0169791	CXCL17, CYP1B1, PTGS2, C3, NOX1
GOTERM_BP_DIRECT	GO:0018146~keratan sulfate biosynthetic process	5	0.708215	0.0192396	OGN, OMD, B3GNT7, B3GNT3, PRELP
GOTERM_BP_DIRECT	GO:2000352~negative regulation of endothelial cell apoptotic process	5	0.708215	0.0192396	ICAM1, FGG, FGA, FGB, KDR
GOTERM_BP_DIRECT	GO:0042113~B cell activation	5	0.708215	0.0216774	LAT2, CXCR5, BANK1, CD79A, BTK
GOTERM_BP_DIRECT	GO:0030217~T cell differentiation	5	0.708215	0.0242957	PTPRC, CD3D, PTPN22, CD4, KIT
GOTERM_BP_DIRECT	GO:0008016~regulation of heart contraction	5	0.708215	0.0270969	FXYD1, DES, PLN, HOPX, CELF2
GOTERM_BP_DIRECT	GO:0001974~blood vessel remodeling	5	0.708215	0.0300832	MEF2C, AGT, RSPO3, CCR2, TGM2
GOTERM_BP_DIRECT	GO:1902042~negative regulation of extrinsic apoptotic signaling pathway via death domain receptors	5	0.708215	0.033256	ICAM1, FGG, FGA, FGB, BMP5
GOTERM_BP_DIRECT	GO:0009968~negative regulation of signal transduction	5	0.708215	0.0366167	RGS22, NLRP12, HHIP, DDIT4L, RGS17
GOTERM_BP_DIRECT	GO:0048565~digestive tract development	5	0.708215	0.0401657	COBL, CLDN18, MYOCD, FAT4, KIT
GOTERM_BP_DIRECT	GO:0042130~negative regulation of T cell proliferation	5	0.708215	0.0478296	HLA-DRB1, FOXJ1, SFTPD, HLA-DRB5, SPN
GOTERM_BP_DIRECT	GO:0002381~immunoglobulin production involved in immunoglobulin mediated immune response	4	0.566572	0.000487434	GAPT, HLA-DQB1, HLA-DRB1, HLA-DRB5
GOTERM_BP_DIRECT	GO:0002503~peptide antigen assembly with MHC class II protein complex	4	0.566572	0.000487434	HLA-DRB1, HLA-DMB, HLA-DMA, HLA-DRA
GOTERM_BP_DIRECT	GO:2001300~lipoxin metabolic process	4	0.566572	0.000487434	ALOX5AP, ALOX5, LTC4S, HPGD
GOTERM_BP_DIRECT	GO:0048007~antigen processing and presentation, exogenous lipid antigen via MHC class Ib	4	0.566572	0.00161281	CD1C, CD1B, CD1A, CD1E
GOTERM_BP_DIRECT	GO:0009308~amine metabolic process	4	0.566572	0.00250923	VCAM1, SULT1C2, INMT, AOC3
GOTERM_BP_DIRECT	GO:0031639~plasminogen activation	4	0.566572	0.00366008	FGG, FGA, FGB, APOH
GOTERM_BP_DIRECT	GO:0045730~respiratory burst	4	0.566572	0.0111495	CD55, CYBB, NOX1, CD52
GOTERM_BP_DIRECT	GO:0006957~complement activation, alternative pathway	4	0.566572	0.0111495	C8B, C7, C3, CFB
GOTERM_BP_DIRECT	GO:0033280~response to vitamin D	4	0.566572	0.0277158	CYP24A1, PTGS2, CD4, AQP3
GOTERM_BP_DIRECT	GO:0043113~receptor clustering	4	0.566572	0.0366587	ITGAL, ITGB2, PIGR, DLG2
GOTERM_BP_DIRECT	GO:0050850~positive regulation of calcium-mediated signaling	4	0.566572	0.0366587	FCER1A, CD3E, CD4, TRAT1
GOTERM_BP_DIRECT	GO:0032753~positive regulation of interleukin-4 production	4	0.566572	0.0366587	CD3E, CD40LG, PRG2, NLRP3
GOTERM_BP_DIRECT	GO:0016338~calcium-independent cell-cell adhesion via plasma membrane cell-adhesion molecules	4	0.566572	0.0416179	CLDN18, CLDN9, CLDN3, CLDN2
GOTERM_BP_DIRECT	GO:0019835~cytolysis	4	0.566572	0.0416179	C8B, C7, C6, LYZ
GOTERM_BP_DIRECT	GO:0071345~cellular response to cytokine stimulus	4	0.566572	0.0468955	CCR7, FLT3, NLRP12, CSF1R
GOTERM_BP_DIRECT	GO:0002291~T cell activation via T cell receptor contact with antigen bound to MHC molecule on antigen presenting cell	3	0.424929	0.00405976	ICAM1, ITGAL, APBB1IP
GOTERM_BP_DIRECT	GO:0043152~induction of bacterial agglutination	3	0.424929	0.00791898	FGA, FGB, DMBT1
GOTERM_BP_DIRECT	GO:0045959~negative regulation of complement activation, classical pathway	3	0.424929	0.00791898	CR1, C4BPB, C4BPA
GOTERM_BP_DIRECT	GO:0072378~blood coagulation, fibrin clot formation	3	0.424929	0.00791898	FGG, FGA, FGB
GOTERM_BP_DIRECT	GO:0072540~T-helper 17 cell lineage commitment	3	0.424929	0.0128733	BATF, SLAMF6, IRF4
GOTERM_BP_DIRECT	GO:0002682~regulation of immune system process	3	0.424929	0.0128733	ORM1, PIP, ORM2
GOTERM_BP_DIRECT	GO:0001768~establishment of T cell polarity	3	0.424929	0.0188361	DOCK2, CCR7, CCL19
GOTERM_BP_DIRECT	GO:0002455~humoral immune response mediated by circulating immunoglobulin	3	0.424929	0.0257254	HLA-DQB1, HLA-DRB1, HLA-DRB5
GOTERM_BP_DIRECT	GO:0070233~negative regulation of T cell apoptotic process	3	0.424929	0.0257254	PIP, DOCK8, SLC46A2
GOTERM_BP_DIRECT	GO:0072678~T cell migration	3	0.424929	0.0257254	CCR6, CCL20, MYO1G
GOTERM_BP_DIRECT	GO:0002606~positive regulation of dendritic cell antigen processing and presentation	3	0.424929	0.0257254	CCR7, CCL19, CD74
GOTERM_BP_DIRECT	GO:0006032~chitin catabolic process	3	0.424929	0.0257254	CHIA, CHI3L2, CHIT1
GOTERM_BP_DIRECT	GO:0090277~positive regulation of peptide hormone secretion	3	0.424929	0.0334641	FGG, FGA, FGB
GOTERM_BP_DIRECT	GO:0045059~positive thymic T cell selection	3	0.424929	0.0334641	DOCK2, CD3D, CD74
GOTERM_BP_DIRECT	GO:0010818~T cell chemotaxis	3	0.424929	0.0334641	PIK3CG, GPR183, CXCR3
GOTERM_BP_DIRECT	GO:0043129~surfactant homeostasis	3	0.424929	0.0334641	LPCAT1, SFTPD, NAPSA
GOTERM_BP_DIRECT	GO:0051963~regulation of synapse assembly	3	0.424929	0.0334641	MEF2C, PPP1R9A, RAB17
GOTERM_BP_DIRECT	GO:0045580~regulation of T cell differentiation	3	0.424929	0.0334641	CD2, HLA-DOA, SLC46A2
GOTERM_BP_DIRECT	GO:0050891~multicellular organismal water homeostasis	3	0.424929	0.0334641	AQP4, SCNN1B, AQP1
GOTERM_BP_DIRECT	GO:0050862~positive regulation of T cell receptor signaling pathway	3	0.424929	0.0334641	KCNN4, CCR7, TRAT1
GOTERM_BP_DIRECT	GO:0045124~regulation of bone resorption	3	0.424929	0.0419796	PDK4, ITGB3, CSF1R
GOTERM_BP_DIRECT	GO:0090197~positive regulation of chemokine secretion	3	0.424929	0.0419796	CHIA, ALOX15B, CSF1R
GOTERM_CC_DIRECT	GO:0016021~integral component of membrane	262	37.1105	2.51929e-10	RARRES3, SGMS2, AQP4, CD52, AQP7, SIDT1, AQP1, ADORA1, KLHDC7A, AQP3, LILRA2, KCNK5, CREB3L1, ADAM8, ROS1, MUC13, KLRB1, CD3G, CD3D, CD3E, PLD5, PLD4, UNC5CL, CDHR4, COLEC12, GPR132, TMEM130, HLA-DQA2, HLA-DQA1, CD37, CCR7, VSIG1, CCR5, CCR4, CD40LG, CX3CR1, CCR2, ROR1, HHLA2, HLA-DPA1, MST1R, CLEC5A, HLA-DRA, ENPP5, GCNT3, CYP1B1, HLA-DRB1, FCER2, ENPP3, ENPP4, CD74, SORCS2, LPCAT1, CD69, TMEM12…
GOTERM_CC_DIRECT	GO:0005886~plasma membrane	255	36.119	5.70919e-21	CYP24A1, CADM3, SGMS2, GDF5, AQP5, AQP4, AQP7, AQP1, ADORA1, AQP3, BTK, ADAM8, ROS1, PIK3CG, KLRB1, CD3G, CD3D, C4A, CD3E, CDHR4, COLEC12, GPR132, HLA-DQA2, HLA-DQA1, CCR7, CCR6, RND1, VSIG1, CCR5, F5, CCR4, ALOX15B, CD40LG, CX3CR1, CATSPER1, CCR2, RAB17, PLA2G2A, ROR1, TFPI, HLA-DPA1, MST1R, CLEC5A, HLA-DRA, ENPP5, HLA-DRB1, FCER2, ENPP4, CD74, HLA-DRB5, LGSN, EMB, HLA-DPB1, HLA-DOA, FCER1A, CFB…
GOTERM_CC_DIRECT	GO:0070062~extracellular exosome	182	25.779	9.31276e-16	GNA14, A2M, SLC44A4, FAM20A, PGC, CRABP2, MMP7, AQP5, TSPAN8, SELENBP1, AQP1, AZGP1, OGN, MS4A1, APOH, CFI, PDGFD, SLC4A4, DDAH1, SPN, MUC13, MB, C4A, CRTAC1, FBP1, MGP, COLEC12, NAPSA, SCEL, PRELP, RETN, LAT2, CD37, CST6, ALOX15B, RAB17, MNDA, PLA2G2A, MFAP4, LRRK2, WFDC2, HLA-DRA, ITGAL, GCNT3, HLA-DRB1, FCER2, ENPP3, ENPP4, ITGB2, KMO, EPHA10, ITGB3, CD74, ITGAM, FGG, DOCK2, FGA, FOLR1, FGB, I…
GOTERM_CC_DIRECT	GO:0005887~integral component of plasma membrane	136	19.2635	2.89065e-26	CADM3, SGMS2, SLC6A20, AQP5, TLR3, AQP4, CD52, TSPAN8, AQP7, AQP1, TLR7, ADORA1, AQP3, SCTR, MARCO, ST3GAL5, KCNK5, MS4A1, CSF3R, MS4A2, ADAM8, SLC4A4, SPN, PAG1, CD3G, CD3E, TMEM130, CNGA3, HLA-DQA2, HLA-DQA1, TRAT1, SLC34A2, VSIG2, CD37, CCR6, CCR5, CD40LG, CCR4, CCR2, CX3CR1, ROR1, HLA-DPA1, MST1R, CLEC5A, HLA-DRA, FXYD1, PLXNC1, HLA-DRB1, CYSLTR1, ENPP3, FCER2, NINJ2, EPHA10, ITGB3, ABCA4, PC…
GOTERM_CC_DIRECT	GO:0005615~extracellular space	128	18.1303	3.43309e-24	CHIA, PGC, GDF5, PRTG, MMP7, SELENBP1, AZGP1, OGN, APOH, MS4A1, PLA2G1B, CPA3, PDGFD, CFI, MUC13, SPN, SPON1, C4A, NAPSA, PRELP, RETN, SCGB2A1, F5, CST6, CD40LG, TFPI, PLA2G2A, LRRK2, SSC5D, WFDC2, ACHE, PODN, ABCA3, CHIT1, ITGAM, ABI3BP, FGG, FGA, FGB, MSLN, PIP, SFTPD, HLA-DRB5, SFTPC, ANGPTL1, SFTPB, MUC1, BMP3, CFB, CHI3L2, CXCL17, OMD, COL14A1, S100B, SFRP4, PON1, AGR2, CPB2, PON3, MUC5B, BM…
GOTERM_CC_DIRECT	GO:0005576~extracellular region	120	16.9972	3.06583e-14	A2M, CHIA, GDF5, MMP7, AZGP1, OGN, LILRA2, APOH, PLA2G1B, CSF3R, RGN, CPA3, PDGFD, CFI, COL10A1, WFDC10B, C4A, PRELP, F5, TFPI, PLA2G2A, PAEP, MFAP4, WFDC2, WFDC3, ENPP5, ACHE, ELN, CHIT1, ITGBL1, FGG, FGA, FGB, SFTA3, PIP, SFTPD, SFTPC, SFTA2, SFTPB, ADAM28, BMP3, CFB, KDR, CXCL17, B3GAT1, OMD, CD55, COL14A1, S100B, SFRP4, PON1, BMP5, IL22RA2, HABP2, COL21A1, HP, RSPO3, SEMA3E, LTF, ITIH5, SERPI…
GOTERM_CC_DIRECT	GO:0016020~membrane	98	13.881	0.0237408	AQP4, TLR3, RRAD, SELENBP1, CD52, CREB3L1, CFI, ROS1, SPN, PIK3CG, CD3G, NCF4, UNC5CL, CDHR4, HLA-DQA1, CD37, VSIG2, F5, CD40LG, ALOX15B, SSC5D, ITGAL, COBL, GCNT3, ACHE, PLXNC1, CYSLTR1, HLA-DRB1, MAMDC2, ENPP4, ITGB2, ABCA4, ABCA3, SORCS2, CD74, SLCO2A1, MIA2, DOCK2, LPCAT1, FOLR1, B3GNT6, MSLN, HLA-DRB5, HLA-DPB1, ARHGDIB, CSF1R, TLR10, SYT12, MYO1G, NCKAP1L, ATP11A, C16ORF89, DOCK8, SLCO2B1, …
GOTERM_CC_DIRECT	GO:0009986~cell surface	60	8.49858	4.36055e-14	MMP7, TLR3, HLA-DMA, KCNQ3, PLA2G1B, APOH, LTF, HHIP, ADAM8, ROS1, NT5E, DPP4, SPN, VASN, CIITA, ICAM1, CFTR, CCR7, CCR6, CCR5, CD40LG, SLC26A9, TFPI, GPA33, HLA-DPA1, MST1R, CLEC5A, HLA-DRA, AOC3, ITGAL, ACHE, CPM, HLA-DRB1, ITGB2, ITGB3, ALPP, CD74, ITGAM, VCAM1, FGG, FGA, FOLR1, FGB, MSLN, CD2, RTN4RL2, HLA-DPB1, CSF1R, FCER1A, MRC1, PTPRC, CR1, HPN, CD1B, P2RY12, CD55, ITGA8, SFRP4, SCARA5, S…
GOTERM_CC_DIRECT	GO:0005789~endoplasmic reticulum membrane	42	5.94901	0.0476872	CYP1B1, PTGS2, ATP10A, NR3C2, TLR3, LTC4S, SFTPA1, TLR7, MIA2, FMO5, LPCAT1, FOLR1, SHISA3, ALOX5AP, SFTA3, SFTPD, CREB3L1, SFTPC, SDR16C5, CD4, SFTPB, ACSL5, FLRT3, STS, HPN, TRPM8, SPTLC3, CYP21A2, PLD4, UPK3A, GJB1, TMPRSS3, MOXD1, CYP4B1, B3GAT1, CYBB, PTGDS, SFTPA2, PLA2G2A, DIO1, TMEM119, ABCC6
GOTERM_CC_DIRECT	GO:0005783~endoplasmic reticulum	41	5.80737	0.0400101	MAMDC2, PTGS2, FAM20A, CRABP2, ATP10A, AQP5, LTC4S, ADORA1, TLR7, VCAM1, OGN, FMO5, CERKL, LPCAT1, ALOX5AP, TGM2, HSD17B6, CREB3L1, SERPINA1, TMEM100, ACSL5, THBS4, COL4A3, STS, ERP27, PLD4, ATP11A, NLRP3, TMPRSS3, KDR, P2RY13, ITGA8, PLN, TFPI, PLA2G2A, LRRK2, AGR3, LRP2, AGR2, ATP8A1, AOC3
GOTERM_CC_DIRECT	GO:0009897~external side of plasma membrane	39	5.52408	2.52526e-16	HLA-DRB1, FCER2, AQP4, CXCR3, KIT, FCRL6, CD74, VCAM1, FGG, CXCR5, FGA, CD69, FGB, ITGB6, CD2, MS4A1, HLA-DRB5, MS4A2, IL2RG, RTN4RL2, CD4, SCNN1B, GPIHBP1, CD5, SPN, FCER1A, ICAM1, PTPRC, TRPM8, CD3E, SELL, TNFRSF13B, P2RY12, CCR7, CD19, CCR5, CD40LG, CCR4, CD79A
GOTERM_CC_DIRECT	GO:0000139~Golgi membrane	36	5.09915	0.00323998	HLA-DQB1, STEAP4, HLA-DQB2, GCNT3, HLA-DRB1, FUT7, TLR3, TLR7, CD74, LPCAT1, ST3GAL5, FOLR1, B3GNT7, B3GNT6, HLA-DRB5, SERPINA1, B3GNT3, HLA-DPB1, PDGFD, NMNAT2, ICA1, PARM1, GOLT1A, WBSCR17, TMEM130, HLA-DQA2, HLA-DQA1, CD1E, B3GAT1, CD55, F5, ARRB1, ST8SIA4, HLA-DPA1, ATP8A1, HLA-DRA
GOTERM_CC_DIRECT	GO:0005578~proteinaceous extracellular matrix	31	4.39093	4.74732e-08	PODN, COL21A1, MAMDC2, ADAMTS16, ELN, MMP7, MMP28, SFTPA1, OGN, WISP2, COL6A6, COMP, SFTPD, SERPINA1, TFPI2, DPT, COL10A1, SPON1, COL4A4, FLRT3, COL4A3, TNXB, CRTAC1, CILP, MGP, MMP13, PRELP, OMD, COL14A1, ADAMTS8, SFTPA2
GOTERM_CC_DIRECT	GO:0016324~apical plasma membrane	24	3.39943	0.000420653	MUC1, HPN, SHROOM4, SLC6A20, AQP5, CFTR, UPK3A, SLCO2B1, AQP1, SLC34A2, P2RY6, CD55, FOLR1, SORBS2, RAB17, SLC26A9, PIP, SLC5A8, SCNN1B, LRP2, GPIHBP1, MUC13, DPP4, ABCC6
GOTERM_CC_DIRECT	GO:0005765~lysosomal membrane	23	3.25779	0.000449786	HLA-DQB1, VASN, HLA-DQB2, SPNS3, HLA-DRB1, TLR3, ATP11A, CD1B, CFTR, HLA-DMB, HLA-DMA, HLA-DQA2, HLA-DQA1, CD74, ARRB1, HLA-DRB5, HLA-DPA1, HLA-DPB1, CP, HLA-DOA, LRP2, DPP4, HLA-DRA
GOTERM_CC_DIRECT	GO:0031012~extracellular matrix	22	3.11615	0.00277732	TNXB, COL21A1, MMP7, CILP, MGP, MMP13, ABI3BP, SOD3, PRELP, OGN, COL14A1, ADAMTS8, COMP, TGM2, APOH, COL8A1, MFAP4, TFPI2, SSC5D, THBS4, DPT, SPON1
GOTERM_CC_DIRECT	GO:0045121~membrane raft	17	2.40793	0.00358074	ICAM1, PTPRC, OLR1, TRPM8, KCNA3, CD1A, BIRC3, KDR, BTK, CD55, LAT2, CD4, RTN4RL2, CD79A, PAG1, SGCA, DPP4
GOTERM_CC_DIRECT	GO:0005788~endoplasmic reticulum lumen	16	2.26629	0.00446355	COL4A4, COL4A3, STS, ARSE, PTGS2, COL21A1, ERP27, FLT3, COL14A1, F5, CD4, SERPINA1, PDGFD, COL8A1, SPON1, COL10A1
GOTERM_CC_DIRECT	GO:0016323~basolateral plasma membrane	15	2.12465	0.00613113	AQP4, CFTR, AQP1, ADORA1, AQP3, P2RY6, ARRB1, FOLR1, RAB17, CEACAM5, SLC4A4, HPGD, GPIHBP1, DLG2, ABCC6
GOTERM_CC_DIRECT	GO:0010008~endosome membrane	15	2.12465	0.00774775	MRC1, HLA-DQB1, HLA-DQB2, PARM1, NCF4, CD1C, CD1B, TLR3, CD1A, TLR7, HLA-DQA2, HLA-DQA1, HLA-DPA1, HLA-DPB1, HLA-DOA
GOTERM_CC_DIRECT	GO:0005581~collagen trimer	14	1.983	2.71688e-05	COL4A4, COL4A3, COL21A1, COLEC12, SFTPA1, MMP13, C1QTNF7, MARCO, COL14A1, COL6A6, SFTPA2, FCN1, SFTPD, COL10A1
GOTERM_CC_DIRECT	GO:0072562~blood microparticle	14	1.983	0.00367827	A2M, C4A, CFB, C3, HP, C4BPA, ORM1, FGG, FGA, FGB, AGT, PON1, CP, ORM2
GOTERM_CC_DIRECT	GO:0042613~MHC class II protein complex	13	1.84136	2.21752e-12	HLA-DQB1, HLA-DQB2, HLA-DRB1, HLA-DMB, HLA-DQA2, HLA-DMA, CD74, HLA-DQA1, HLA-DRB5, HLA-DPA1, HLA-DPB1, HLA-DOA, HLA-DRA
GOTERM_CC_DIRECT	GO:0030666~endocytic vesicle membrane	13	1.84136	3.89706e-06	HLA-DQB1, HLA-DQB2, HLA-DRB1, NOSTRIN, COLEC12, HLA-DQA2, CD74, HLA-DQA1, MARCO, HLA-DRB5, HLA-DPA1, HLA-DPB1, HLA-DRA
GOTERM_CC_DIRECT	GO:0031225~anchored component of membrane	12	1.69972	0.00271295	CD55, ACHE, TNFRSF10C, CPM, SMPDL3B, MSLN, TFPI, CEACAM6, CD52, CEACAM5, ALPP, NT5E
GOTERM_CC_DIRECT	GO:0030669~clathrin-coated endocytic vesicle membrane	11	1.55807	1.51162e-06	HLA-DQB1, HLA-DQB2, CD207, HLA-DRB1, HLA-DRB5, HLA-DPA1, HLA-DPB1, HLA-DQA2, HLA-DQA1, CD74, HLA-DRA
GOTERM_CC_DIRECT	GO:0012507~ER to Golgi transport vesicle membrane	11	1.55807	1.48744e-05	HLA-DQB1, HLA-DQB2, HLA-DRB1, FOLR1, HLA-DRB5, HLA-DPA1, HLA-DPB1, HLA-DQA2, HLA-DQA1, CD74, HLA-DRA
GOTERM_CC_DIRECT	GO:0032588~trans-Golgi network membrane	11	1.55807	0.000833536	HLA-DQB1, HLA-DQB2, HLA-DRB1, PLD4, HLA-DRB5, HLA-DPA1, HLA-DPB1, HLA-DQA2, HLA-DQA1, CD74, HLA-DRA
GOTERM_CC_DIRECT	GO:0071556~integral component of lumenal side of endoplasmic reticulum membrane	10	1.41643	5.4409e-07	HLA-DQB1, HLA-DQB2, HLA-DRB1, HLA-DRB5, HLA-DPA1, HLA-DPB1, HLA-DQA2, HLA-DQA1, CD74, HLA-DRA
GOTERM_CC_DIRECT	GO:0030658~transport vesicle membrane	10	1.41643	6.60711e-06	HLA-DQB1, HLA-DQB2, HLA-DRB1, HLA-DRB5, HLA-DPA1, HLA-DPB1, HLA-DQA2, HLA-DQA1, CD74, HLA-DRA
GOTERM_CC_DIRECT	GO:0043235~receptor complex	10	1.41643	0.0420307	CR2, OLR1, ITGB6, NR3C2, ROR1, ITGB2, PIGR, ITGB3, LRP2, TLR7
GOTERM_CC_DIRECT	GO:0031982~vesicle	10	1.41643	0.0438224	MUC1, KCNN4, SPNS3, PLN, SLC6A14, GPRC5A, ALDH3B1, BMP5, SLC34A2, MUC16
GOTERM_CC_DIRECT	GO:0005796~Golgi lumen	9	1.27479	0.0234884	MUC1, OGN, OMD, MUC21, MUC13, SOD3, MUC5B, PRELP, MUC16
GOTERM_CC_DIRECT	GO:1903561~extracellular vesicle	8	1.13314	0.00207593	OGN, C8B, F5, FGA, FGB, ITGB2, ATP1A2, PRELP
GOTERM_CC_DIRECT	GO:0031093~platelet alpha granule lumen	8	1.13314	0.0036087	ORM1, FGG, A2M, F5, FGA, FGB, SERPINA1, ORM2
GOTERM_CC_DIRECT	GO:0031090~organelle membrane	8	1.13314	0.0388061	FMO5, MAP1LC3C, CYP1B1, PTGS2, CYP21A2, TFPI, SLC39A8, CYP4B1
GOTERM_CC_DIRECT	GO:0008305~integrin complex	7	0.991501	0.000345958	ITGA9, ITGAL, ITGA8, ITGB6, ITGB2, ITGB3, ITGAM
GOTERM_CC_DIRECT	GO:0042599~lamellar body	6	0.849858	3.18569e-06	SFTPA2, SFTA3, SFTPD, SFTPC, SFTPA1, SFTPB
GOTERM_CC_DIRECT	GO:0045334~clathrin-coated endocytic vesicle	6	0.849858	0.000138132	SFTPA2, SFTA3, SFTPD, SFTPC, SFTPA1, SFTPB
GOTERM_CC_DIRECT	GO:0042101~T cell receptor complex	6	0.849858	0.000359958	CD3G, CD3D, CD3E, CD4, APBB1IP, TRAT1
GOTERM_CC_DIRECT	GO:0005577~fibrinogen complex	5	0.708215	0.000187898	FGG, FGA, FGB, FGL2, FGL1
GOTERM_CC_DIRECT	GO:0009925~basal plasma membrane	5	0.708215	0.022343	P2RY12, ITGA9, SHROOM4, AQP5, AQP1
GOTERM_CC_DIRECT	GO:0042629~mast cell granule	4	0.566572	0.039003	PIK3CG, LAT2, KIT, BTK
GOTERM_CC_DIRECT	GO:0042105~alpha-beta T cell receptor complex	3	0.424929	0.0122475	CD3G, CD3D, CD3E
GOTERM_CC_DIRECT	GO:0097208~alveolar lamellar body	3	0.424929	0.0179318	NAPSA, ABCA3, SFTPB
GOTERM_CC_DIRECT	GO:0097486~multivesicular body lumen	3	0.424929	0.0245057	SFTPC, NAPSA, SFTPB
GOTERM_CC_DIRECT	GO:0005579~membrane attack complex	3	0.424929	0.0245057	C8B, C7, C6
GOTERM_CC_DIRECT	GO:0005858~axonemal dynein complex	3	0.424929	0.0488666	DNALI1, DNAH2, DNAH7
GOTERM_MF_DIRECT	GO:0005509~calcium ion binding	41	5.80737	0.00413798	ME3, TNNC1, MMP28, DNAH7, PCDHAC1, LPCAT1, CD69, FAT4, COMP, PLCH1, PLA2G12B, PLA2G1B, RGN, PCDHA12, ADAM8, AMY2A, HPGDS, VWA2, THBS4, TESC, RASEF, CRTAC1, CAPN8, CAPN9, SYT12, MGP, CDHR4, PADI2, MMP13, S100B, SNED1, ALOX15B, CAPN13, PON1, PLA2G2A, SYTL2, SYTL3, LRP2, SGCA, HABP2, AOC3
GOTERM_MF_DIRECT	GO:0042803~protein homodimerization activity	37	5.24079	0.0361719	HNF1B, ACHE, CADM3, PTGS2, TNNC1, KIT, ZBTB16, CD2, CEACAM5, CD4, MUC13, DPP4, HPGDS, CSF1R, FLRT3, TESC, CR2, TRPM8, FLT3, C16ORF89, NR0B2, TOX3, GJB1, NCR3, SYNE1, PPP1R9A, S100B, CCR2, PON1, CTSE, DPYD, LRRK2, AGR2, HPGD, PON3, CRYM, AOC3
GOTERM_MF_DIRECT	GO:0005102~receptor binding	30	4.24929	3.35102e-05	ACOX2, PLXNC1, A2M, CADM3, C3, BLK, BTK, PGR, FGG, FGA, FGB, RSPO3, PLA2G1B, CD2, CCDC129, ANGPTL1, LTB, SELPLG, DPP4, FYB, ITK, BMP3, DDO, NCR3, TNFSF8, CCL17, CCL13, RND1, TNFSF13B, TNFSF12-TNFSF13
GOTERM_MF_DIRECT	GO:0004872~receptor activity	24	3.39943	3.81465e-06	MRC1, ICAM1, CADM3, TNFRSF13B, TLR3, TNFRSF17, ITGB2, CXCR3, ITGB3, TLR7, CD180, NCR3, CCR6, LILRA2, FOLR1, ITGB6, CD2, GPA33, CSF3R, CD4, RTN4RL2, TREM1, CD5, CSF2RA
GOTERM_MF_DIRECT	GO:0030246~carbohydrate binding	22	3.11615	8.41005e-06	KLRB1, CHIA, OLR1, WBSCR17, SELL, FCER2, PRG2, CHI3L2, SFTPA1, SIGLEC14, CLEC10A, SIGLEC1, CLECL1, CD207, SIGLEC6, CD69, SIGLEC5, FCN1, SFTPA2, SFTPD, CD22, CLEC5A
GOTERM_MF_DIRECT	GO:0004888~transmembrane signaling receptor activity	20	2.83286	0.000281349	KLRB1, MRC1, ICAM1, TLR10, CR2, CD3G, CD3D, CD3E, CLDN3, TLR3, TLR7, MARCO, TNFRSF10C, FCGR2B, CD69, FCGR2C, CD4, CD79A, CD5, SPN
GOTERM_MF_DIRECT	GO:0004252~serine-type endopeptidase activity	19	2.69122	0.00523904	TMPRSS2, HPN, C4A, CFB, C3, MMP7, HP, CTSS, MMP13, TMPRSS6, TMPRSS3, GZMK, F5, FCN1, LTF, CFI, ADAM8, DPP4, HABP2
GOTERM_MF_DIRECT	GO:0008201~heparin binding	17	2.40793	0.000219552	TNXB, SELL, PRG2, MMP7, ABI3BP, SOD3, PRELP, OGN, WISP2, CCL23, ADAMTS8, RSPO3, COMP, APOH, LTF, SERPIND1, THBS4
GOTERM_MF_DIRECT	GO:0005215~transporter activity	16	2.26629	0.00653712	ABCA8, CRABP2, AQP4, AQP7, AQP1, SLCO2B1, ABCA4, ABCA3, AQP3, ABCA6, SLCO2A1, PTGDS, SLC22A3, SLCO5A1, SLC46A2, ABCC6
GOTERM_MF_DIRECT	GO:0005044~scavenger receptor activity	13	1.84136	9.08659e-08	MARCO, TMPRSS2, HPN, PRG4, ENPP3, SUSD2, COLEC12, CFI, SSC5D, CD5, SCARA5, TMPRSS3, DMBT1
GOTERM_MF_DIRECT	GO:0001618~virus receptor activity	13	1.84136	6.72945e-06	MRC1, ICAM1, CR1, CD55, CR2, CCR5, HLA-DRB1, ITGB6, CD4, ITGB3, CLEC5A, SELPLG, DPP4
GOTERM_MF_DIRECT	GO:0016887~ATPase activity	13	1.84136	0.0333762	ABCA8, DNAH11, KIF12, DNAH12, CFTR, ATP1A2, DNAH2, DNAH7, ABCA4, ABCA3, DNAH5, ABCA6, ATP13A4
GOTERM_MF_DIRECT	GO:0004867~serine-type endopeptidase inhibitor activity	12	1.69972	0.000725882	A2M, SPINK13, CPAMD8, AGT, TFPI, ITIH5, SPINK1, SERPINA1, SERPIND1, TFPI2, WFDC2, WFDC3
GOTERM_MF_DIRECT	GO:0005178~integrin binding	12	1.69972	0.00140452	VCAM1, COL4A3, ICAM1, WISP2, ADAMTS8, TNXB, ICAM4, FCER2, ITGB6, TSPAN8, KDR, THBS4
GOTERM_MF_DIRECT	GO:0050839~cell adhesion molecule binding	11	1.55807	6.76773e-05	VCAM1, ITGAL, CADM3, FGG, FGA, FGB, SELL, ITGB2, ITGB3, ADAM8, NCR3
GOTERM_MF_DIRECT	GO:0005201~extracellular matrix structural constituent	11	1.55807	0.000132832	COL4A4, COL4A3, COL14A1, TNXB, COMP, ELN, MGP, CD4, TFPI2, MUC5B, PRELP
GOTERM_MF_DIRECT	GO:0032395~MHC class II receptor activity	10	1.41643	3.96721e-10	HLA-DQB1, HLA-DQB2, HLA-DRB1, HLA-DPA1, HLA-DPB1, HLA-DOA, HLA-DMA, HLA-DQA2, HLA-DQA1, HLA-DRA
GOTERM_MF_DIRECT	GO:0005518~collagen binding	9	1.27479	0.00132663	ITGA9, ACHE, PODN, COL14A1, COMP, CTSS, LRRC15, MMP13, ABI3BP
GOTERM_MF_DIRECT	GO:0004866~endopeptidase inhibitor activity	8	1.13314	0.000502821	A2M, C4A, CPAMD8, C3, TFPI, SPINK1, SERPIND1, WFDC2
GOTERM_MF_DIRECT	GO:0008009~chemokine activity	8	1.13314	0.00175197	CCL13, CCL22, CCL23, CCL14, CCL20, CXCL2, CCL19, CCL17
GOTERM_MF_DIRECT	GO:0050660~flavin adenine dinucleotide binding	8	1.13314	0.00798042	ACOX2, CHDH, FMO5, CYBB, ACOXL, AOX1, KMO, DPYD
GOTERM_MF_DIRECT	GO:0001948~glycoprotein binding	8	1.13314	0.00867359	AZGP1, PIP, APOH, CD4, ITGB2, SERPINA1, LRRK2, ITGAM
GOTERM_MF_DIRECT	GO:0023026~MHC class II protein complex binding	7	0.991501	1.25229e-05	HLA-DRB1, MS4A1, HLA-DMB, HLA-DOA, HLA-DMA, CD74, HLA-DRA
GOTERM_MF_DIRECT	GO:0042605~peptide antigen binding	7	0.991501	0.000407381	HLA-DQB1, HLA-DRB1, HLA-DRB5, HLA-DPA1, HLA-DPB1, HLA-DQA1, HLA-DRA
GOTERM_MF_DIRECT	GO:0042626~ATPase activity, coupled to transmembrane movement of substances	7	0.991501	0.00469057	ABCA8, ABCC3, CFTR, ABCA4, ABCA3, ABCA6, ABCC6
GOTERM_MF_DIRECT	GO:0004860~protein kinase inhibitor activity	7	0.991501	0.0106287	FLRT3, TESC, PODN, PPP1R1B, RTN4RL2, LRRC15, CISH
GOTERM_MF_DIRECT	GO:0004950~chemokine receptor activity	6	0.849858	0.000257265	CCR6, CCR5, CCR4, CCR2, CX3CR1, CXCR3
GOTERM_MF_DIRECT	GO:0048020~CCR chemokine receptor binding	6	0.849858	0.0011696	CCL13, CCL22, CCL14, CCL20, CCL19, CCL17
GOTERM_MF_DIRECT	GO:0004714~transmembrane receptor protein tyrosine kinase activity	6	0.849858	0.0112018	FLT3, ROR1, KIT, ROS1, CSF1R, KDR
GOTERM_MF_DIRECT	GO:0016493~C-C chemokine receptor activity	5	0.708215	0.000654622	CCR7, CCR6, CCR5, CCR4, CCR2
GOTERM_MF_DIRECT	GO:0015254~glycerol channel activity	5	0.708215	0.000654622	AQP5, AQP4, AQP7, AQP1, AQP3
GOTERM_MF_DIRECT	GO:0045028~G-protein coupled purinergic nucleotide receptor activity	5	0.708215	0.00124983	P2RY12, P2RY13, P2RY6, P2RY10, GPR171
GOTERM_MF_DIRECT	GO:0015250~water channel activity	5	0.708215	0.00214578	AQP5, AQP4, AQP7, AQP1, AQP3
GOTERM_MF_DIRECT	GO:0043236~laminin binding	5	0.708215	0.0115439	ITGA9, ACHE, CTSS, LRRC15, SSC5D
GOTERM_MF_DIRECT	GO:0004364~glutathione transferase activity	5	0.708215	0.0360814	ALOX5AP, CLIC5, CLIC6, LTC4S, HPGDS
GOTERM_MF_DIRECT	GO:0004896~cytokine receptor activity	5	0.708215	0.0394764	FLT3, CSF3R, IL2RG, CSF2RA, CD74
GOTERM_MF_DIRECT	GO:0030884~exogenous lipid antigen binding	4	0.566572	0.00044035	CD1C, CD1B, CD1A, CD1E
GOTERM_MF_DIRECT	GO:0030883~endogenous lipid antigen binding	4	0.566572	0.00044035	CD1C, CD1B, CD1A, CD1E
GOTERM_MF_DIRECT	GO:0008329~signaling pattern recognition receptor activity	4	0.566572	0.00145983	MARCO, FCN1, COLEC12, DMBT1
GOTERM_MF_DIRECT	GO:0071723~lipopeptide binding	4	0.566572	0.0022734	CD1C, CD1B, CD1A, CD1E
GOTERM_MF_DIRECT	GO:0030881~beta-2-microglobulin binding	4	0.566572	0.00617815	CD1C, CD1B, CD1A, CD1E
GOTERM_MF_DIRECT	GO:0030414~peptidase inhibitor activity	4	0.566572	0.018344	WFDC10B, TFPI, WFDC2, WFDC3
GOTERM_MF_DIRECT	GO:0019863~IgE binding	3	0.424929	0.0120463	FCER1A, FCER2, MS4A2
GOTERM_MF_DIRECT	GO:0004556~alpha-amylase activity	3	0.424929	0.0120463	AMY2B, AMY2A, AMY1A
GOTERM_MF_DIRECT	GO:0042608~T cell receptor binding	3	0.424929	0.0176409	DOCK2, CD3G, CD3E
GOTERM_MF_DIRECT	GO:0004568~chitinase activity	3	0.424929	0.0241134	CHIA, CHI3L2, CHIT1
GOTERM_MF_DIRECT	GO:0008061~chitin binding	3	0.424929	0.0313934	CHIA, CHI3L2, CHIT1
GOTERM_MF_DIRECT	GO:0005068~transmembrane receptor protein tyrosine kinase adaptor activity	3	0.424929	0.0481142	STAP1, TRAT1, PAG1
KEGG_PATHWAY	hsa04514:Cell adhesion molecules (CAMs)	33	4.67422	9.78787e-15	HLA-DQB1, ITGAL, CLDN18, CADM3, CLDN9, HLA-DRB1, CLDN3, ITGB2, HLA-DMB, HLA-DMA, ITGAM, VCAM1, CD2, CD22, HLA-DRB5, CD4, HLA-DPB1, HLA-DOA, SELPLG, SPN, ICAM1, PTPRC, SELL, HLA-DQA2, HLA-DQA1, SIGLEC1, NCAM2, ITGA9, CD40LG, ITGA8, CLDN2, HLA-DPA1, HLA-DRA
KEGG_PATHWAY	hsa04060:Cytokine-cytokine receptor interaction	29	4.10765	3.11426e-06	GDF5, CXCL2, IL21R, CXCR3, CCL22, CCL23, CCL20, CXCR5, CSF3R, IL2RG, LTB, CSF2RA, CSF1R, TNFRSF13B, TNFRSF17, CCL19, TNFSF8, CCL17, TNFRSF10C, CCR7, CCL13, CCR6, CCL14, TNFSF13B, CCR5, CCR4, CD40LG, CCR2, CX3CR1
KEGG_PATHWAY	hsa04640:Hematopoietic cell lineage	28	3.96601	2.11316e-16	HLA-DRB1, FCER2, KIT, ITGB3, ITGAM, MS4A1, CD2, CD22, HLA-DRB5, CSF3R, CD4, CD5, CSF2RA, CSF1R, CR1, CR2, CD3G, CD3D, FLT3, CD3E, CD1C, CD1B, CD1A, CD1E, CD37, CD55, CD19, HLA-DRA
KEGG_PATHWAY	hsa04145:Phagosome	28	3.96601	3.36754e-10	HLA-DQB1, HLA-DRB1, C3, ITGB2, ITGB3, SFTPA1, HLA-DMB, HLA-DMA, ITGAM, MARCO, COMP, SFTPD, HLA-DRB5, HLA-DPB1, HLA-DOA, THBS4, MRC1, OLR1, NCF4, COLEC12, CTSS, HLA-DQA2, HLA-DQA1, FCGR2B, FCGR2C, SFTPA2, HLA-DPA1, HLA-DRA
KEGG_PATHWAY	hsa05150:Staphylococcus aureus infection	23	3.25779	1.87258e-16	HLA-DQB1, ICAM1, ITGAL, C4A, HLA-DRB1, CFB, C3, ITGB2, HLA-DMB, HLA-DMA, HLA-DQA2, ITGAM, HLA-DQA1, FGG, FCGR2B, FCGR2C, HLA-DRB5, HLA-DPA1, CFI, HLA-DPB1, HLA-DOA, SELPLG, HLA-DRA
KEGG_PATHWAY	hsa04610:Complement and coagulation cascades	21	2.9745	8.44259e-12	C7, CR1, A2M, CR2, C4A, C3, CFB, C6, C4BPB, C4BPA, C8B, FGG, CD55, F5, FGA, FGB, TFPI, SERPINA1, SERPIND1, CFI, CPB2
KEGG_PATHWAY	hsa05152:Tuberculosis	21	2.9745	0.000109957	MRC1, CIITA, HLA-DQB1, CR1, HLA-DRB1, C3, ITGB2, CTSS, HLA-DMB, HLA-DMA, HLA-DQA2, ITGAM, HLA-DQA1, CD74, FCGR2B, FCGR2C, HLA-DRB5, HLA-DPA1, HLA-DPB1, HLA-DOA, HLA-DRA
KEGG_PATHWAY	hsa05166:HTLV-I infection	21	2.9745	0.00936808	HLA-DQB1, PIK3CG, ICAM1, ITGAL, CD3G, HLA-DRB1, CD3D, CD3E, ITGB2, HLA-DMB, HLA-DMA, HLA-DQA2, HLA-DQA1, VCAM1, HLA-DRB5, HLA-DPA1, IL2RG, HLA-DPB1, HLA-DOA, NFATC2, HLA-DRA
KEGG_PATHWAY	hsa04062:Chemokine signaling pathway	20	2.83286	0.000596934	PIK3CG, ITK, CXCL2, CCL19, CXCR3, CCL17, DOCK2, CCR7, CCL22, CCL13, CCL23, CCR6, CCL14, CCR5, CCL20, CXCR5, CCR4, ARRB1, CCR2, CX3CR1
KEGG_PATHWAY	hsa05164:Influenza A	19	2.69122	0.00071321	PIK3CG, CIITA, HLA-DQB1, ICAM1, TMPRSS2, HLA-DRB1, TLR3, HLA-DMB, NLRP3, HLA-DMA, TLR7, HLA-DQA2, HLA-DQA1, TNFRSF10C, HLA-DRB5, HLA-DPA1, HLA-DPB1, HLA-DOA, HLA-DRA
KEGG_PATHWAY	hsa05140:Leishmaniasis	18	2.54958	8.24426e-09	HLA-DQB1, CR1, PTGS2, HLA-DRB1, C3, NCF4, ITGB2, HLA-DMB, HLA-DMA, HLA-DQA2, ITGAM, HLA-DQA1, FCGR2C, HLA-DRB5, HLA-DPA1, HLA-DPB1, HLA-DOA, HLA-DRA
KEGG_PATHWAY	hsa05416:Viral myocarditis	17	2.40793	1.84707e-09	HLA-DQB1, ICAM1, ITGAL, HLA-DRB1, ITGB2, HLA-DMB, HLA-DMA, HLA-DQA2, HLA-DQA1, CD55, CD40LG, HLA-DRB5, HLA-DPA1, HLA-DPB1, HLA-DOA, SGCA, HLA-DRA
KEGG_PATHWAY	hsa05323:Rheumatoid arthritis	17	2.40793	1.30941e-06	HLA-DQB1, ICAM1, ITGAL, HLA-DRB1, ITGB2, HLA-DMB, HLA-DMA, HLA-DQA2, HLA-DQA1, TNFSF13B, CCL20, HLA-DRB5, HLA-DPA1, HLA-DPB1, HLA-DOA, LTB, HLA-DRA
KEGG_PATHWAY	hsa05322:Systemic lupus erythematosus	17	2.40793	0.000284873	HLA-DQB1, C7, C4A, HLA-DRB1, C3, C6, HLA-DMB, HLA-DMA, HLA-DQA2, HLA-DQA1, C8B, CD40LG, HLA-DRB5, HLA-DPA1, HLA-DPB1, HLA-DOA, HLA-DRA
KEGG_PATHWAY	hsa04672:Intestinal immune network for IgA production	16	2.26629	8.13934e-10	HLA-DQB1, HLA-DRB1, TNFRSF13B, TNFRSF17, PIGR, HLA-DMB, HLA-DMA, HLA-DQA2, HLA-DQA1, TNFSF13B, CD40LG, HLA-DRB5, HLA-DPA1, HLA-DPB1, HLA-DOA, HLA-DRA
KEGG_PATHWAY	hsa05145:Toxoplasmosis	16	2.26629	9.89617e-05	CIITA, HLA-DQB1, HLA-DRB1, HLA-DMB, BIRC3, HLA-DMA, HLA-DQA2, HLA-DQA1, CCR5, CD40LG, HLA-DRB5, HLA-DPA1, ALOX5, HLA-DPB1, HLA-DOA, HLA-DRA
KEGG_PATHWAY	hsa05310:Asthma	15	2.12465	7.07863e-12	FCER1A, HLA-DQB1, HLA-DRB1, PRG2, HLA-DMB, HLA-DMA, HLA-DQA2, HLA-DQA1, CD40LG, MS4A2, HLA-DRB5, HLA-DPA1, HLA-DPB1, HLA-DOA, HLA-DRA
KEGG_PATHWAY	hsa05321:Inflammatory bowel disease (IBD)	15	2.12465	5.86601e-07	HLA-DQB1, HLA-DRB1, IL21R, RORC, HLA-DMB, HLA-DMA, HLA-DQA2, HLA-DQA1, STAT4, HLA-DRB5, IL2RG, HLA-DPA1, HLA-DPB1, HLA-DOA, HLA-DRA
KEGG_PATHWAY	hsa04612:Antigen processing and presentation	15	2.12465	5.18346e-06	CIITA, HLA-DQB1, HLA-DRB1, CTSS, HLA-DMB, HLA-DMA, HLA-DQA2, CD74, HLA-DQA1, HLA-DRB5, CD4, HLA-DPA1, HLA-DPB1, HLA-DOA, HLA-DRA
KEGG_PATHWAY	hsa05169:Epstein-Barr virus infection	15	2.12465	0.00101005	PIK3CG, HLA-DQB1, ICAM1, ITGAL, CR2, HLA-DRB1, FCER2, HLA-DQA2, HLA-DQA1, CD19, HLA-DRB5, HLA-DPA1, HLA-DPB1, SPN, HLA-DRA
KEGG_PATHWAY	hsa04974:Protein digestion and absorption	13	1.84136	0.000489411	COL4A4, COL4A3, KCNN4, COL14A1, COL21A1, COL6A6, KCNK5, ELN, CPA3, ATP1A2, CPB2, DPP4, COL10A1
KEGG_PATHWAY	hsa05330:Allograft rejection	12	1.69972	3.53426e-07	HLA-DQB1, HLA-DRB1, CD40LG, HLA-DRB5, HLA-DPA1, HLA-DPB1, HLA-DMB, HLA-DOA, HLA-DMA, HLA-DQA2, HLA-DQA1, HLA-DRA
KEGG_PATHWAY	hsa05320:Autoimmune thyroid disease	12	1.69972	1.36911e-05	HLA-DQB1, HLA-DRB1, CD40LG, HLA-DRB5, HLA-DPA1, HLA-DPB1, HLA-DMB, HLA-DOA, HLA-DMA, HLA-DQA2, HLA-DQA1, HLA-DRA
KEGG_PATHWAY	hsa04670:Leukocyte transendothelial migration	12	1.69972	0.0132906	PIK3CG, VCAM1, ICAM1, ITK, ITGAL, CLDN18, CLDN9, CLDN3, NCF4, CLDN2, ITGB2, ITGAM
KEGG_PATHWAY	hsa05332:Graft-versus-host disease	11	1.55807	1.00352e-06	HLA-DQB1, HLA-DRB1, HLA-DRB5, HLA-DPA1, HLA-DPB1, HLA-DMB, HLA-DOA, HLA-DMA, HLA-DQA2, HLA-DQA1, HLA-DRA
KEGG_PATHWAY	hsa05340:Primary immunodeficiency	11	1.55807	1.36607e-06	CIITA, PTPRC, CD19, CD3D, CD3E, CD40LG, TNFRSF13B, IL2RG, CD4, CD79A, BTK
KEGG_PATHWAY	hsa04940:Type I diabetes mellitus	11	1.55807	1.11463e-05	HLA-DQB1, HLA-DRB1, HLA-DRB5, HLA-DPA1, HLA-DPB1, HLA-DMB, HLA-DOA, HLA-DMA, HLA-DQA2, HLA-DQA1, HLA-DRA
KEGG_PATHWAY	hsa04512:ECM-receptor interaction	10	1.41643	0.0150473	COL4A4, COL4A3, ITGA9, TNXB, COL6A6, COMP, ITGA8, ITGB6, ITGB3, THBS4
KEGG_PATHWAY	hsa04064:NF-kappa B signaling pathway	10	1.41643	0.0150473	VCAM1, ICAM1, CCL13, TNFSF13B, PTGS2, CD40LG, CCL19, BIRC3, LTB, BTK
KEGG_PATHWAY	hsa05144:Malaria	9	1.27479	0.00130769	KLRB1, VCAM1, ICAM1, ITGAL, CR1, CD40LG, COMP, ITGB2, THBS4
KEGG_PATHWAY	hsa00590:Arachidonic acid metabolism	9	1.27479	0.00537447	PTGDS, PTGS2, ALOX15B, PLA2G12B, PLA2G2A, PLA2G1B, ALOX5, LTC4S, HPGDS
KEGG_PATHWAY	hsa05133:Pertussis	9	1.27479	0.0180193	C4A, C3, SFTPA2, C4BPB, ITGB2, SFTPA1, C4BPA, NLRP3, ITGAM
KEGG_PATHWAY	hsa05414:Dilated cardiomyopathy	9	1.27479	0.0330863	ITGA9, DES, TNNC1, PLN, ITGA8, ITGB6, ITGB3, CACNA1D, SGCA
KEGG_PATHWAY	hsa04662:B cell receptor signaling pathway	8	1.13314	0.0333232	PIK3CG, CD19, CR2, FCGR2B, CD22, CD79A, NFATC2, BTK
KEGG_PATHWAY	hsa04976:Bile secretion	8	1.13314	0.0333232	ABCC3, AQP4, CFTR, ATP1A2, NR0B2, SLC4A4, AQP1, SCTR
KEGG_PATHWAY	hsa04973:Carbohydrate digestion and absorption	7	0.991501	0.0101632	PIK3CG, HKDC1, ATP1A2, AMY2B, CACNA1D, AMY2A, AMY1A
KEGG_PATHWAY	hsa02010:ABC transporters	7	0.991501	0.0126979	ABCA8, ABCC3, CFTR, ABCA4, ABCA3, ABCA6, ABCC6

## Sheet: Upgrade DEGs in ESR2 group
Category	Term	Count	%	PValue	Genes
GOTERM_BP_DIRECT	GO:0007155~cell adhesion	6	7.22892	0.0361566	CLCA2, COL7A1, PKP1, ADAM23, DSC3, COL4A6
GOTERM_BP_DIRECT	GO:0030326~embryonic limb morphogenesis	5	6.0241	1.89851e-05	HOXC10, DLX6, DLX5, BMP7, HOXD10
GOTERM_BP_DIRECT	GO:0030855~epithelial cell differentiation	5	6.0241	0.000174107	RHCG, DLX6, DLX5, UPK1B, BMP7
GOTERM_BP_DIRECT	GO:0008544~epidermis development	5	6.0241	0.000367623	COL7A1, KRT5, SPRR2A, BNC1, SPRR3
GOTERM_BP_DIRECT	GO:0001501~skeletal system development	5	6.0241	0.00218375	HOXC10, DLX6, DLX5, HOXD13, BMP7
GOTERM_BP_DIRECT	GO:0007156~homophilic cell adhesion via plasma membrane adhesion molecules	5	6.0241	0.00365111	DSG3, CDHR1, SDK2, DSC3, PCDH19
GOTERM_BP_DIRECT	GO:0007010~cytoskeleton organization	4	4.81928	0.0265082	KRT6B, KRT5, BLK, KRT13
GOTERM_BP_DIRECT	GO:0009952~anterior/posterior pattern specification	3	3.61446	0.0406019	HOXC10, HOXD13, HOXD10
GOTERM_BP_DIRECT	GO:0021520~spinal cord motor neuron cell fate specification	2	2.40964	0.0276027	HOXC10, HOXD10
GOTERM_BP_DIRECT	GO:0060687~regulation of branching involved in prostate gland morphogenesis	2	2.40964	0.0276027	HOXD13, BMP7
GOTERM_BP_DIRECT	GO:0043281~regulation of cysteine-type endopeptidase activity involved in apoptotic process	2	2.40964	0.0392014	EPHA7, SOX2
GOTERM_BP_DIRECT	GO:0048935~peripheral nervous system neuron development	2	2.40964	0.0392014	NTRK2, HOXD10
GOTERM_BP_DIRECT	GO:0048646~anatomical structure formation involved in morphogenesis	2	2.40964	0.0430373	DLX6, DLX5
GOTERM_CC_DIRECT	GO:0070062~extracellular exosome	20	24.0964	0.0151609	COCH, GDA, KRT6B, LGALS7, KRT13, CALB1, A2ML1, LGALS7B, CD19, KRT74, NEB, PKP1, KRT5, RHCG, CALML3, DSG3, UPK1B, MS4A1, SPRR3, SERPINB13
GOTERM_CC_DIRECT	GO:0005887~integral component of plasma membrane	12	14.4578	0.0269881	EPHA7, CLCA2, CD19, SLCO1A2, RHCG, ADAM23, PTPRZ1, GABRA3, CDHR1, NTRK2, UPK1B, MS4A1
GOTERM_CC_DIRECT	GO:0045095~keratin filament	4	4.81928	0.00784104	KRT74, KRT6B, KRT5, KRT13
GOTERM_CC_DIRECT	GO:0030057~desmosome	3	3.61446	0.00423717	PKP1, DSG3, DSC3
GOTERM_MF_DIRECT	GO:0005509~calcium ion binding	8	9.63855	0.0307267	CALML3, DSG3, CDHR1, NELL2, DSC3, CALB1, PCDH19, CACNA1B
GOTERM_MF_DIRECT	GO:0043565~sequence-specific DNA binding	7	8.43373	0.0216394	HOXC10, DLX6, SOX2, FOXE1, DMRT2, HOXD10, HOXD11
GOTERM_MF_DIRECT	GO:0005198~structural molecule activity	6	7.22892	0.003825	KRT74, KRT5, SPRR2A, UPK1B, SPRR3, KRT13
GOTERM_MF_DIRECT	GO:0048403~brain-derived neurotrophic factor binding	2	2.40964	0.0125655	NTRK2, HAP1
KEGG_PATHWAY	hsa04727:GABAergic synapse	3	3.61446	0.0376665	GABRA3, HAP1, CACNA1B
